# Supplementary material for: Nidulaxanthone A, a xanthone dimer with a heptacyclic 6/6/6/6/6/6/6 ring system fromAspergillussp.-F029
Source: Royal Society of Chemistry journal article supplement (doi:10.1039/d0qo00113a), 2020-01-01
Supplement: d0qo00113a1.pdf [file d0qo00113a1.pdf]

## Nidulaxanthone A, a Xanthone Dimer with Heptacyclic 6/6/6/6/6/6/6/6

### Ring System from *Aspergillus* sp-F029

Fuqian Wang,<sup>a,†</sup> Jie Jiang,<sup>a,†</sup> Song Hu,<sup>a,†</sup> Xincan Hao,<sup>d</sup> You-sheng Cai,<sup>c</sup> Ying Ye,<sup>b</sup> Haoran Ma,<sup>a</sup> Weiguang Sun,<sup>b</sup> Lu Cheng,<sup>a</sup> Chuanqi Huang,<sup>a</sup> Hucheng Zhu,<sup>b</sup> Hong Zhang,<sup>a</sup> Geng Zhang,<sup>a,\*</sup> Yonghui Zhang<sup>\*,b</sup>

---

<sup>a</sup> *Department of Pharmacy, Wuhan No.1 Hospital, Wuhan 430022, Hubei, People's Republic of China*

<sup>b</sup> *Hubei Key Laboratory of Natural Medicinal Chemistry and Resource Evaluation, School of Pharmacy, Tongji Medical College, Huazhong University of Science and Technology, Wuhan 430030, China.*

<sup>c</sup> *Institute of TCM and Natural Products, School of Pharmaceutical Sciences, Wuhan University, 185 Donghu Road, Wuhan 430071, People's Republic of China*

<sup>d</sup> *College of Pharmacy Hubei University of Medicine, Shiyan 442000, China*

---

\*Corresponding author Tel.: (86) 27-83692892

E-mail: zhangyh@mails.tjmu.edu.cn; zhanggen888@126.com

## Contents of Supporting Information

| <b>Contents</b>                                                         | <b>Pages</b> |
|-------------------------------------------------------------------------|--------------|
| 1D and 2D NMR data (COSY, NOESY, HMBC) for compounds <b>1–2</b>         | 3–4          |
| 1D and 2D NMR spectra of compounds <b>1–6</b>                           | 5–24         |
| HR-MS, MS-MS, IR, UV, and CD spectra of compounds <b>1</b> and <b>2</b> | 25–29        |
| X-ray crystallographic structure of compounds <b>1</b> and <b>2</b>     | 30           |

**Table S1. <sup>1</sup>H (400 MHz), <sup>13</sup>C (100 MHz) and 2D NMR data (COSY, NOESY, HMBC) for compound 1 in CDCl<sub>3</sub>, (δ in ppm, J in Hz)**

| no    | $\delta_{\text{H}}^a$ | $\delta_{\text{C}}$ | COSY         | HMBC                  | NOESY  |
|-------|-----------------------|---------------------|--------------|-----------------------|--------|
| 1     |                       | 163.0               |              |                       |        |
| 1-OH  | 12.05 s               |                     |              | 1                     |        |
| 2     | 6.38 s                | 111.2               |              | 1, 3, 6, 17           |        |
| 3     |                       | 151.1               |              |                       |        |
| 4     | 6.31 s                | 108.0               |              | 2, 5, 6, 7, 17        |        |
| 5     |                       | 158.4               |              |                       |        |
| 6     |                       | 104.8               |              |                       |        |
| 7     |                       | 181.3               |              |                       |        |
| 8     |                       | 129.3               |              |                       |        |
| 9     |                       | 82.8                |              |                       |        |
| 11    | 7.30 d (1.6)          | 140.7               | 12           | 7, 8, 9, 13, 8', 9'   | 11'    |
| 12    | 3.03 dd (10.0,1.6)    | 39.4                | 11, 13       | 8, 9, 11, 13, 8', 11' | 13     |
| 13    | 3.41 m                | 33.9                | 12, 13', 14  | 11, 13', 14'          | 12, 14 |
| 14    | 4.51 d (5.6)          | 70.9                | 13           | 7, 8, 9, 12, 15       | 13     |
| 15    |                       | 168.5               |              |                       |        |
| 16    | 3.66 s                | 53.4                |              | 15                    |        |
| 17    | 2.30 s                | 22.5                |              | 2, 3, 4               |        |
| 18    |                       |                     |              |                       |        |
| 1'    |                       | 162.5               |              |                       |        |
| 1'-OH | 11.60 s               |                     |              | 1'                    |        |
| 2'    | 6.50 s                | 112.6               |              | 1', 4', 6', 17'       |        |
| 3'    |                       | 150.6               |              |                       |        |
| 4'    | 6.43 s                | 108.6               |              | 2', 5', 6', 7', 17'   |        |
| 5'    |                       | 156.8               |              |                       |        |
| 6'    |                       | 104.6               |              |                       |        |
| 7'    |                       | 196.4               |              |                       |        |
| 8'    |                       | 52.0                |              |                       |        |
| 9'    |                       | 84.2                |              |                       |        |
| 11'   | 6.63 d (8.4)          | 125.9               | 12'          | 7', 8', 9', 13'       | 11     |
| 12'   | 6.32 m                | 133.0               | 11', 13'     | 8', 13'               | 14'    |
| 13'   | 3.26 m                | 40.7                | 12', 13, 14' | 9'                    |        |
| 14'   | 3.99 d (3.2)          | 70.4                | 13'          | 12', 13, 15'          | 12'    |
| 15'   |                       | 170.3               |              |                       |        |
| 16'   | 3.64 s                | 53.3                |              | 15'                   |        |
| 17'   | 2.33 s                | 22.6                |              | 2', 3', 4'            |        |

**Table S2. <sup>1</sup>H (400 MHz), <sup>13</sup>C (100 MHz) and 2D NMR data (COSY, NOESY, HMBC) for compound 2 in CDCl<sub>3</sub>, ( $\delta$  in ppm, *J* in Hz)**

| no    | $\delta_{\text{H}}^a$   | $\delta_{\text{C}}$ | COSY   | HMBC                    |
|-------|-------------------------|---------------------|--------|-------------------------|
| 1     |                         | 163.0               |        |                         |
| 1-OH  | 12.08 s                 |                     |        | 1, 2, 3, 6, 7           |
| 2     | 6.39 s                  | 111.8               |        | 1, 4, 6, 17             |
| 3     |                         | 150.4               |        |                         |
| 4     | 6.31 s                  | 108.7               |        | 2, 5, 6, 7, 17          |
| 5     |                         | 157.7               |        |                         |
| 6     |                         | 105.8               |        |                         |
| 7     |                         | 185.0               |        |                         |
| 8     |                         | 128.5               |        |                         |
| 9     |                         | 81.5                |        |                         |
| 11    | 7.20 t (3.2)            | 138.5               | 12     | 7, 9, 12, 13            |
| 12    | 2.79 m                  | 28.4                | 11, 13 | 8, 11                   |
|       | 2.52 ddd (20.4,4.4,1.6) |                     | 11, 13 | 8, 11, 13, 14           |
| 13    | 3.77 m                  | 75.7                | 12, 14 | 9, 11, 14, 18           |
| 14    | 4.70 d (4.4)            | 68.6                | 13     | 7, 8, 9, 12, 13, 14, 15 |
| 14-OH | 2.77 s                  |                     |        | 7, 8, 9, 11, 13, 14, 15 |
| 15    |                         | 169.6               |        |                         |
| 16    | 3.61 s                  | 53.3                |        | 15                      |
| 17    | 2.26 s                  | 22.6                |        | 2, 3, 4                 |
| 18    | 3.31 s                  | 57.9                |        | 13                      |

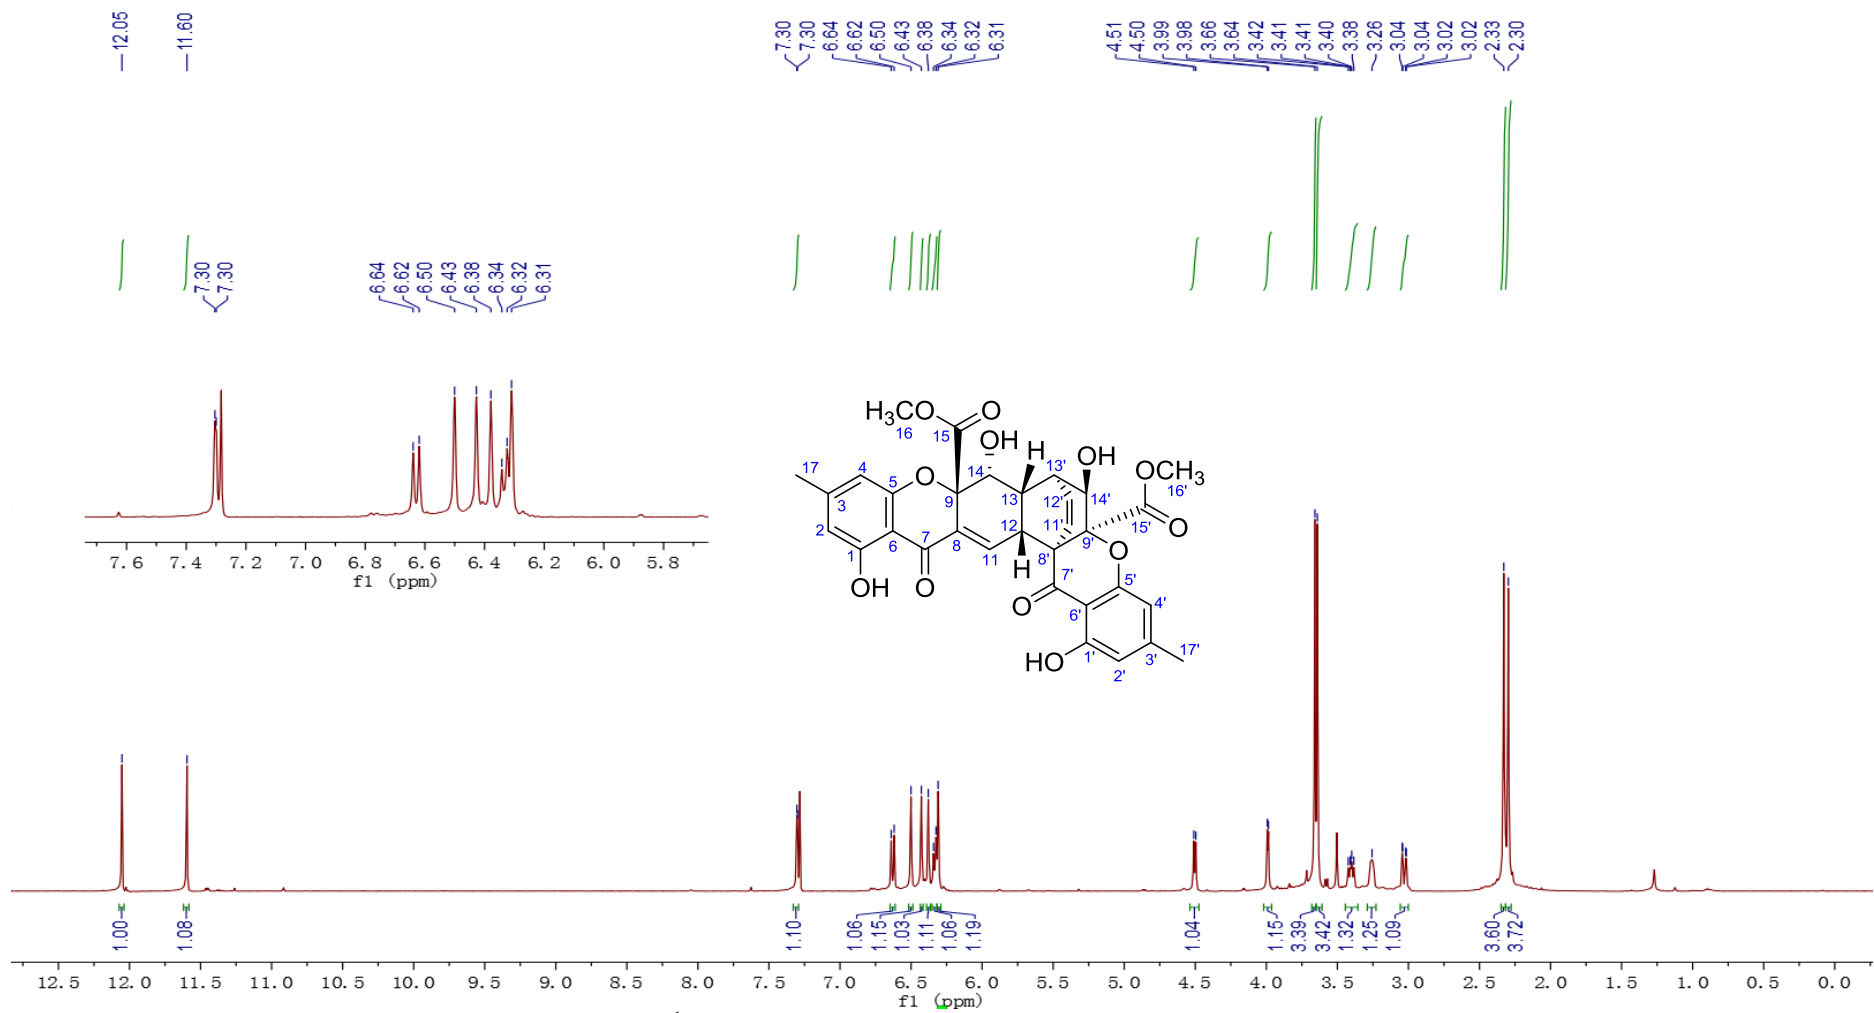

Figure S1. <sup>1</sup>H NMR spectrum of nidulaxanthone A (1) in CDCl<sub>3</sub>.

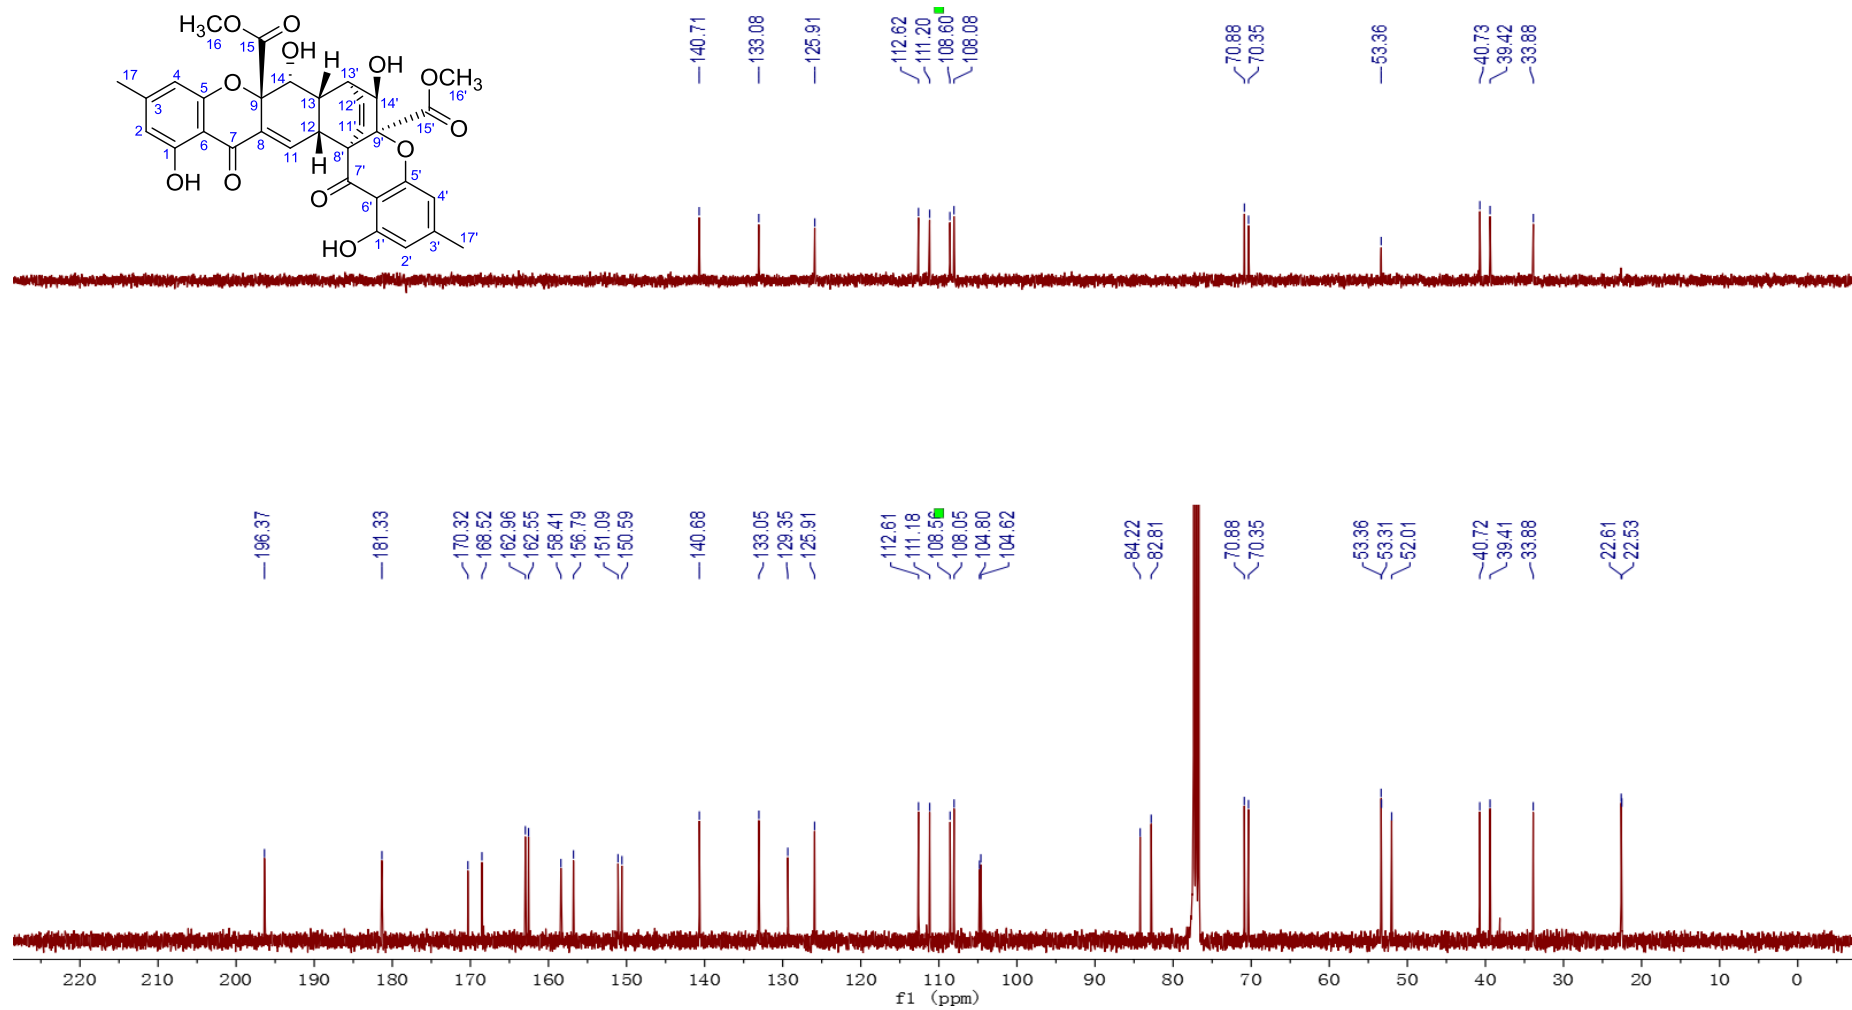

Figure S2.  $^{13}\text{C}$  NMR and DEPT spectra of nidulaxanthone A (**1**) in  $\text{CDCl}_3$ .

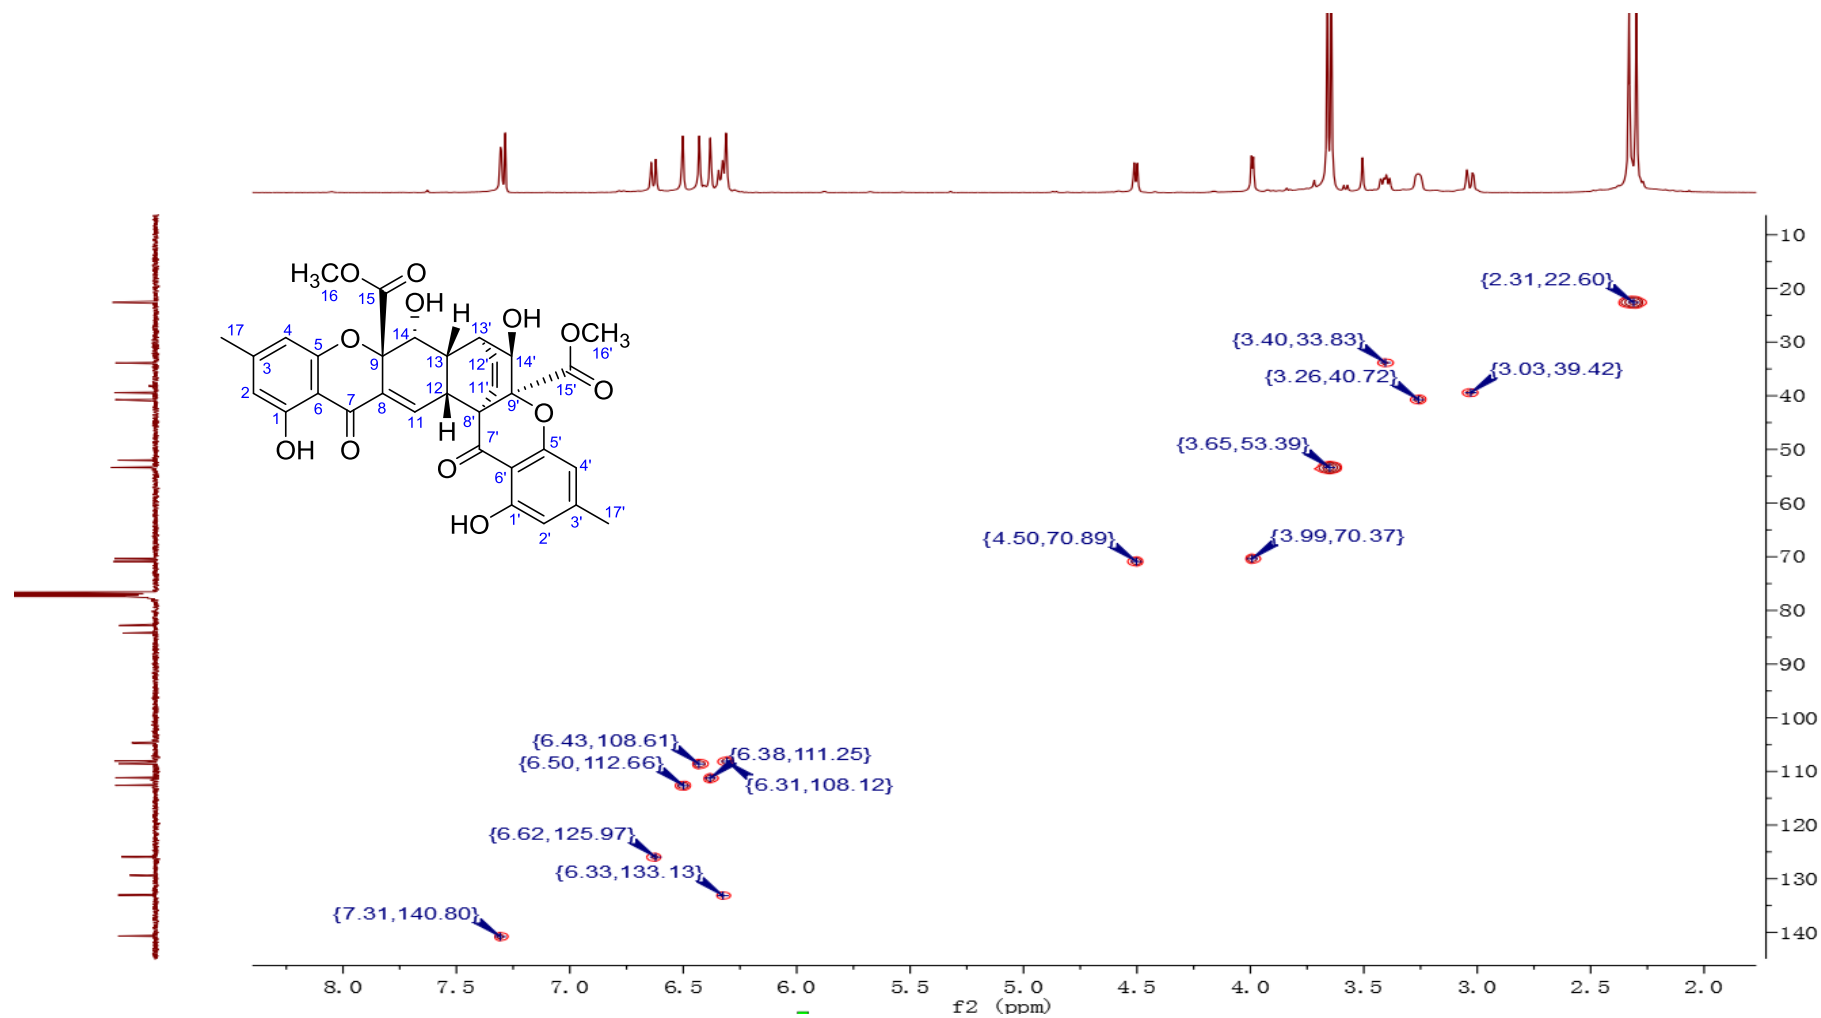

Figure S3. HSQC spectrum of nidulaxanthone A (1) in  $\text{CDCl}_3$

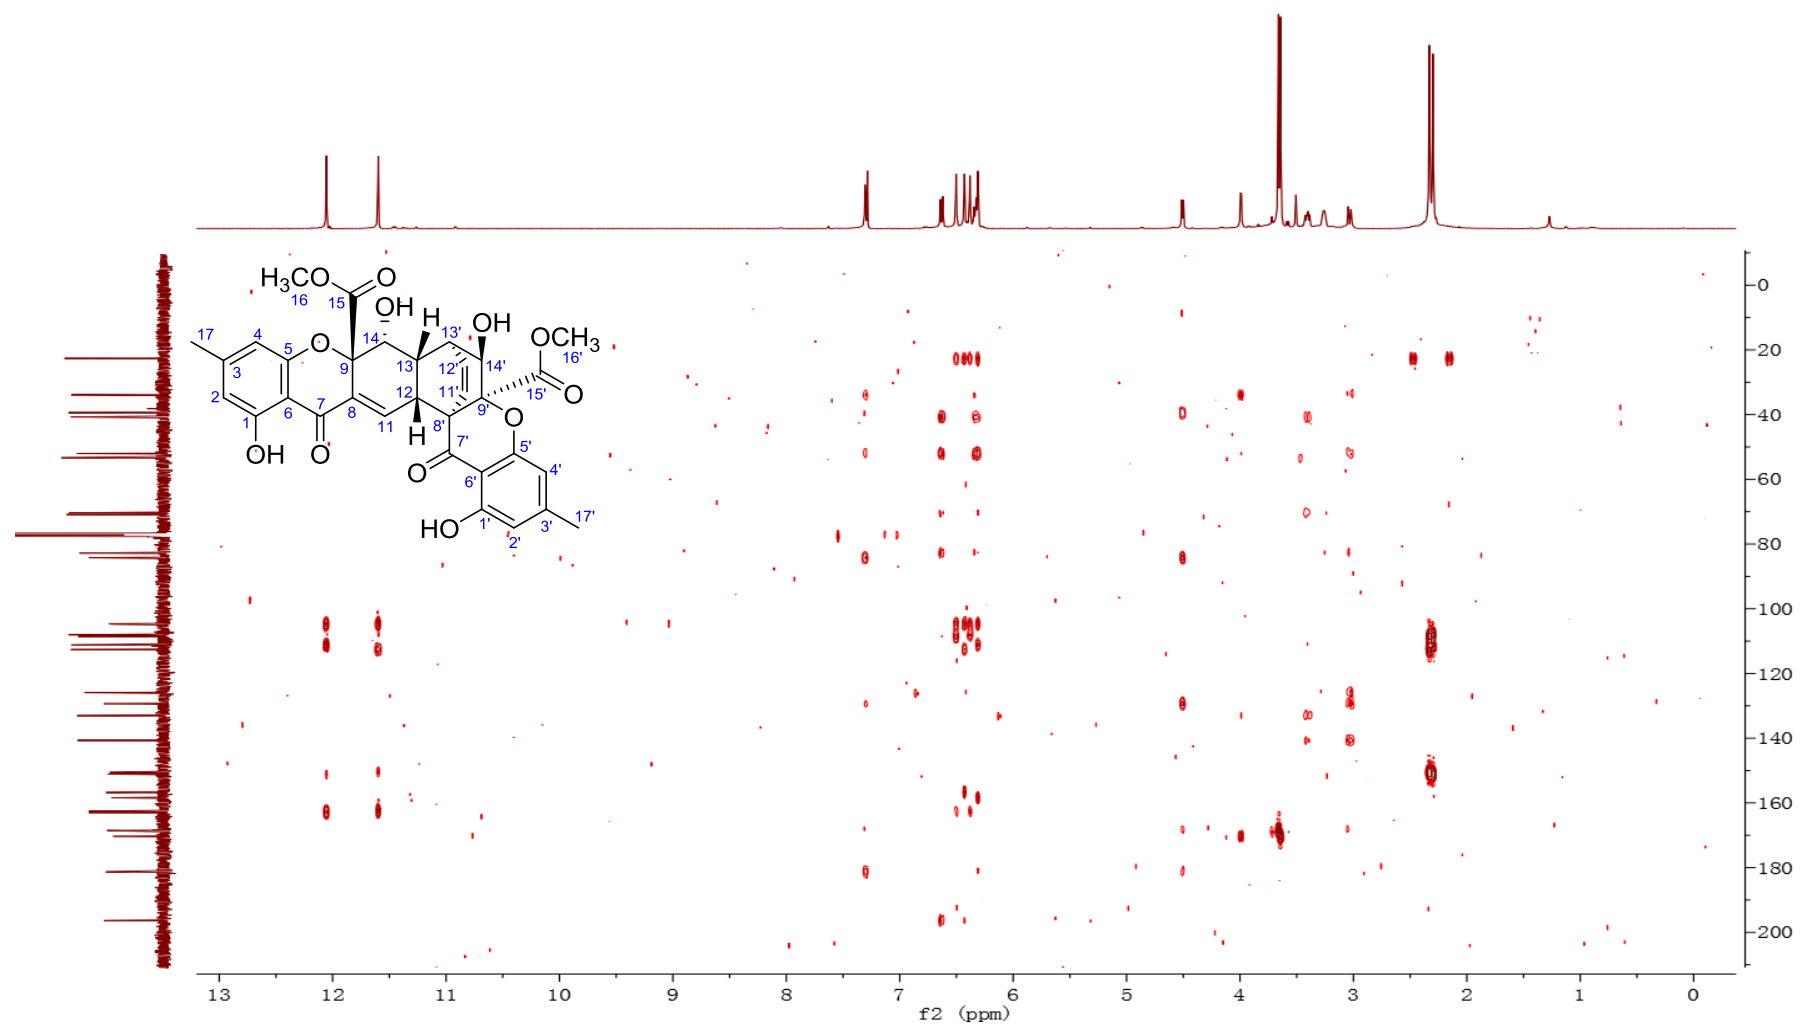

**Figure S4.** HMBC spectrum of nidulaxanthone A (**1**) in CDCl<sub>3</sub>.



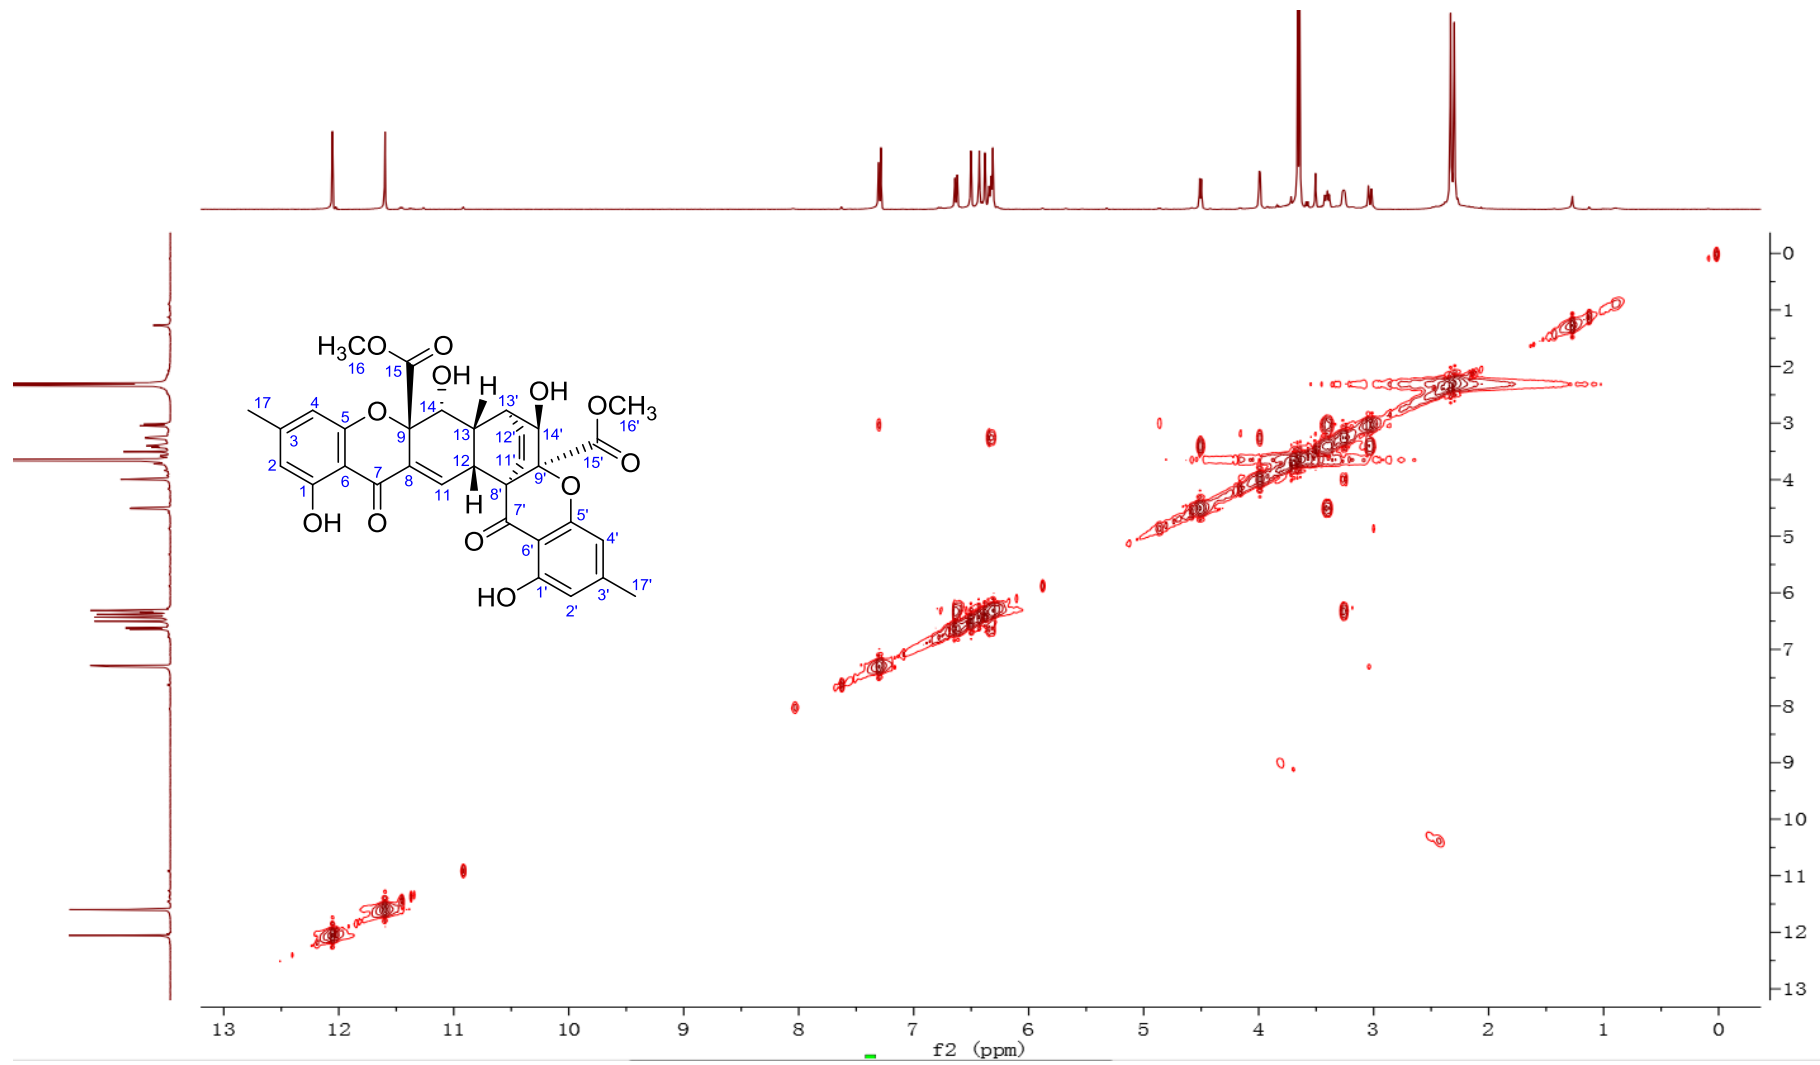

**Figure S5.**  $^1\text{H}$ - $^1\text{H}$  COSY spectrum of nidulaxanthone A (1) in  $\text{CDCl}_3$ .



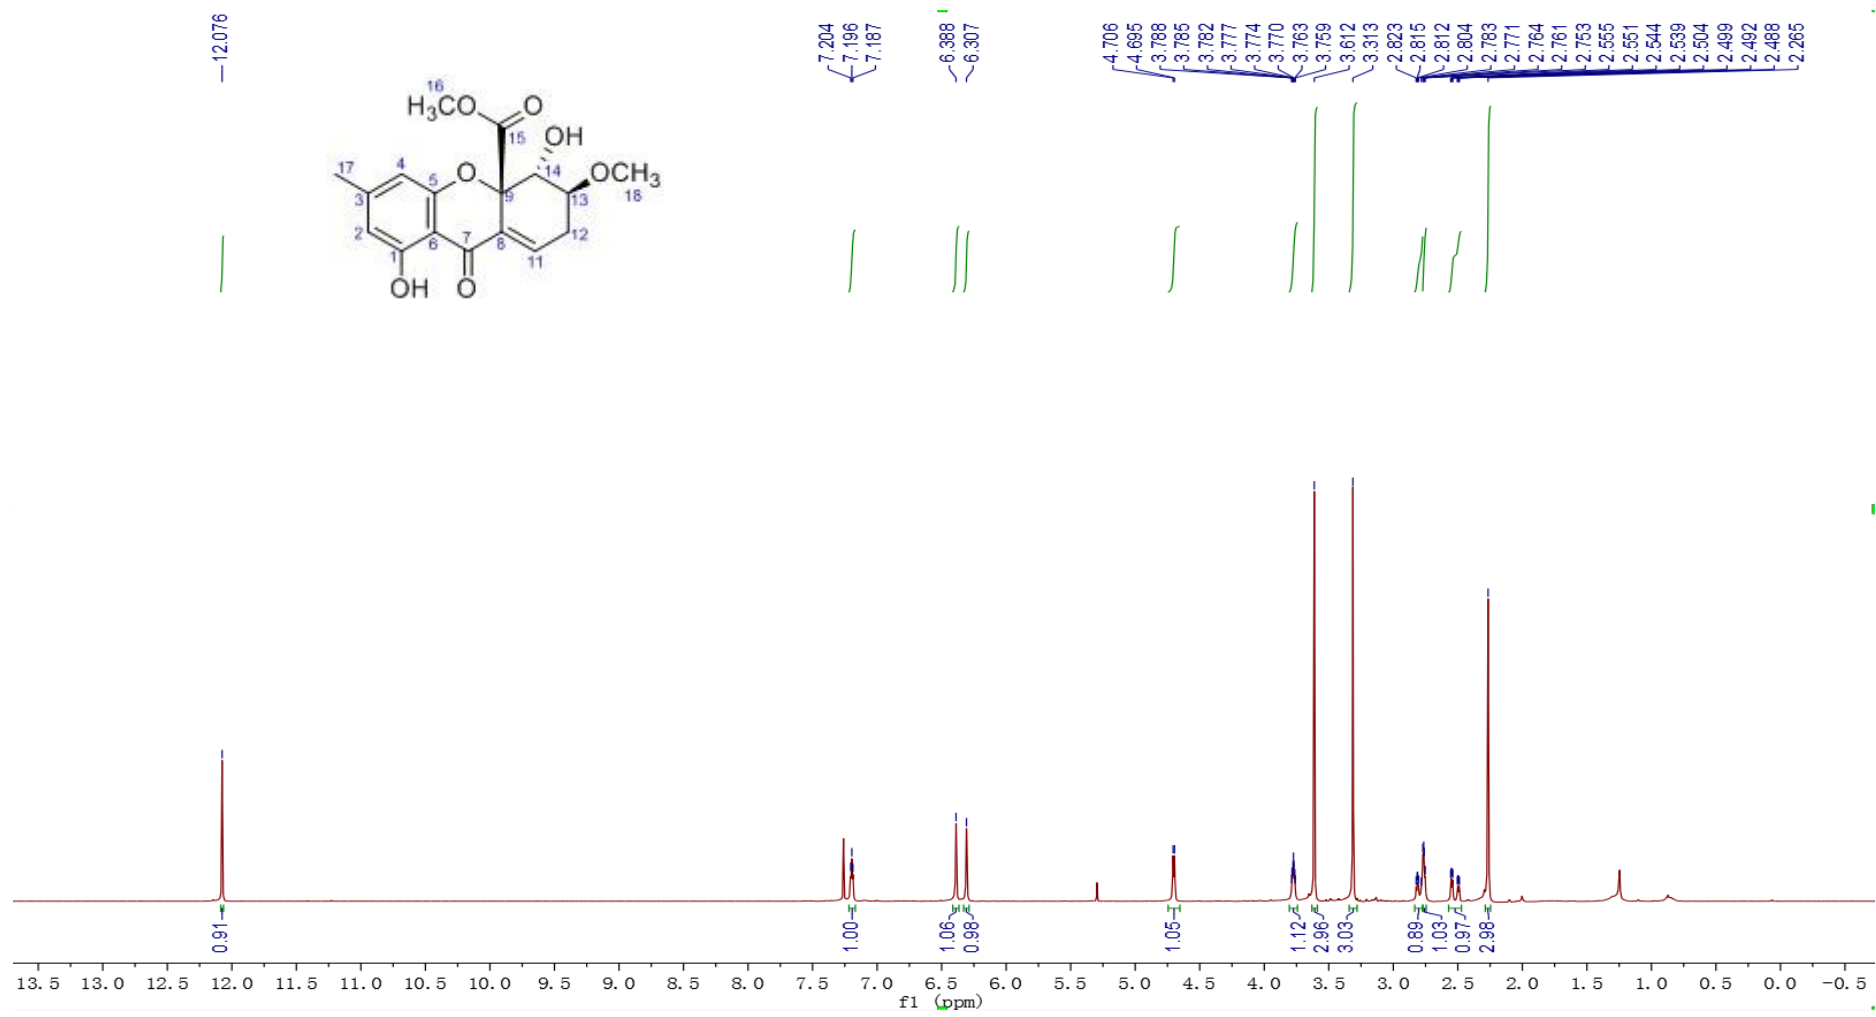

Figure S7. <sup>1</sup>H NMR spectrum of nidulalin D (2) in CDCl<sub>3</sub>.

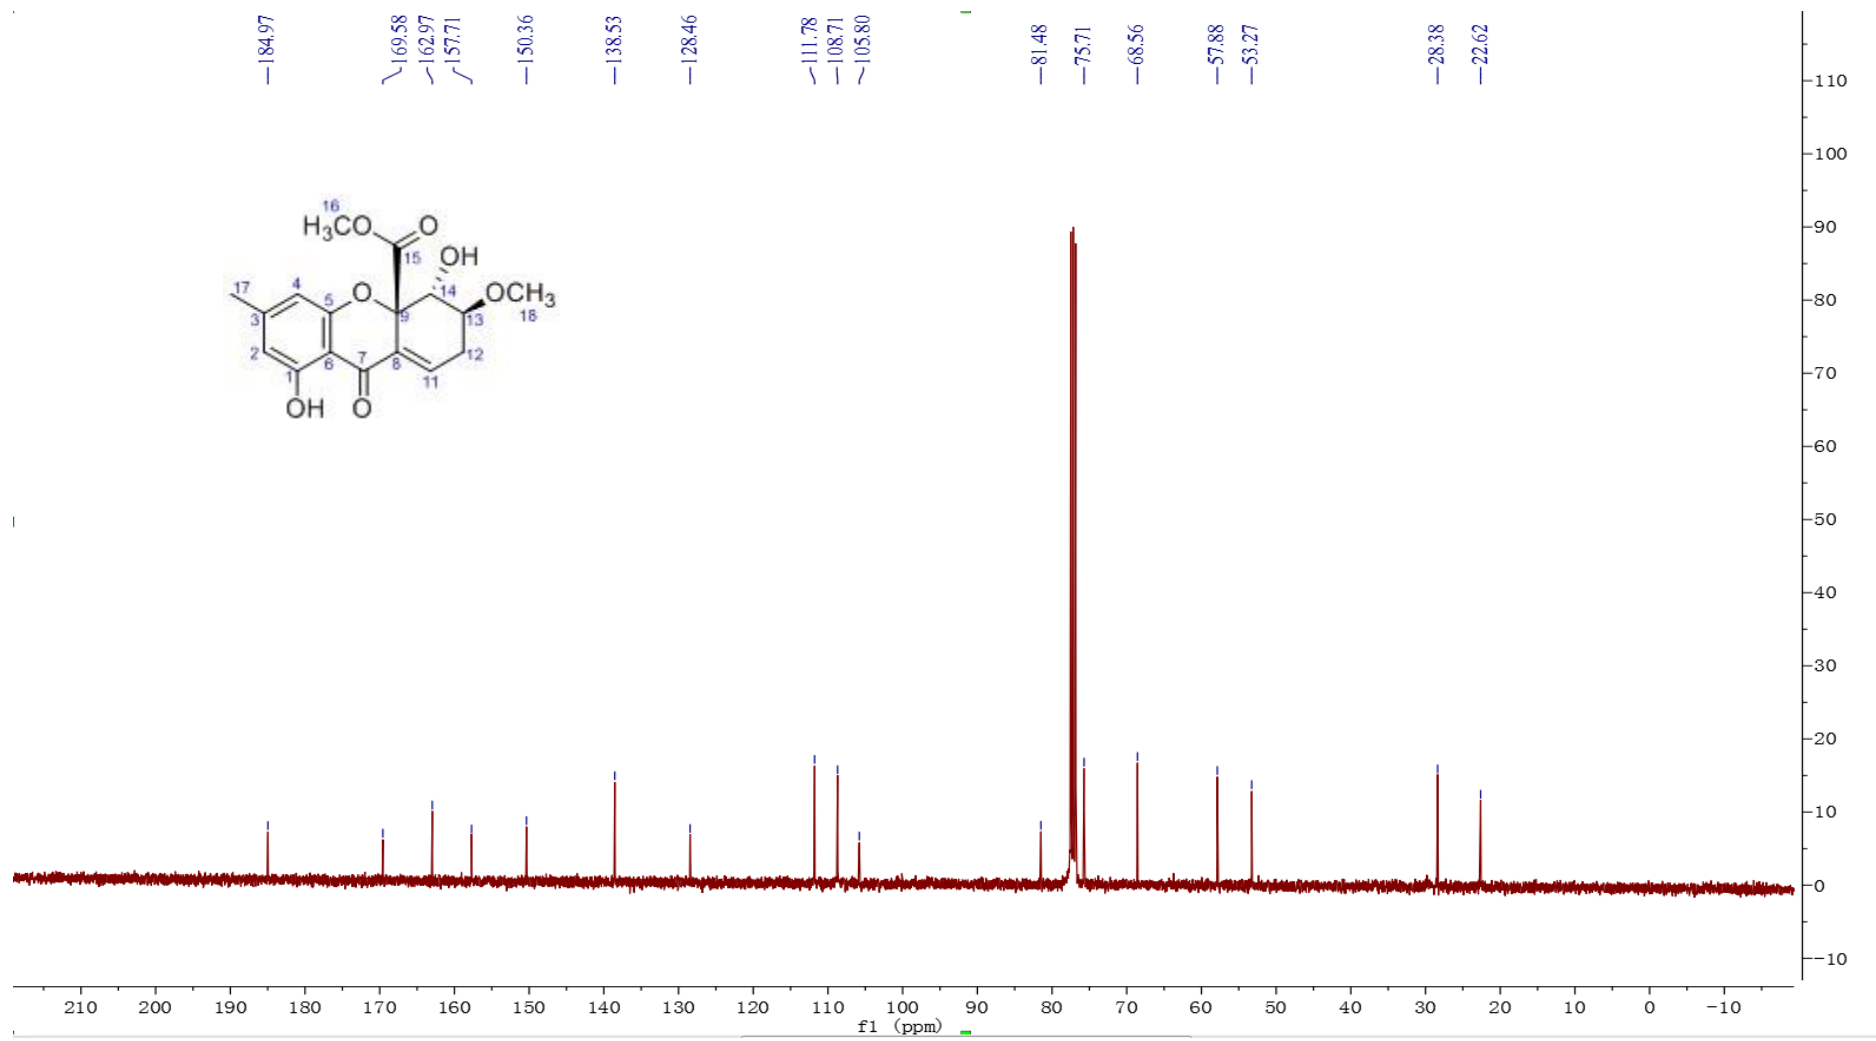

Figure S8. <sup>13</sup>C NMR spectrum of nidulalin D (2) in CDCl<sub>3</sub>.

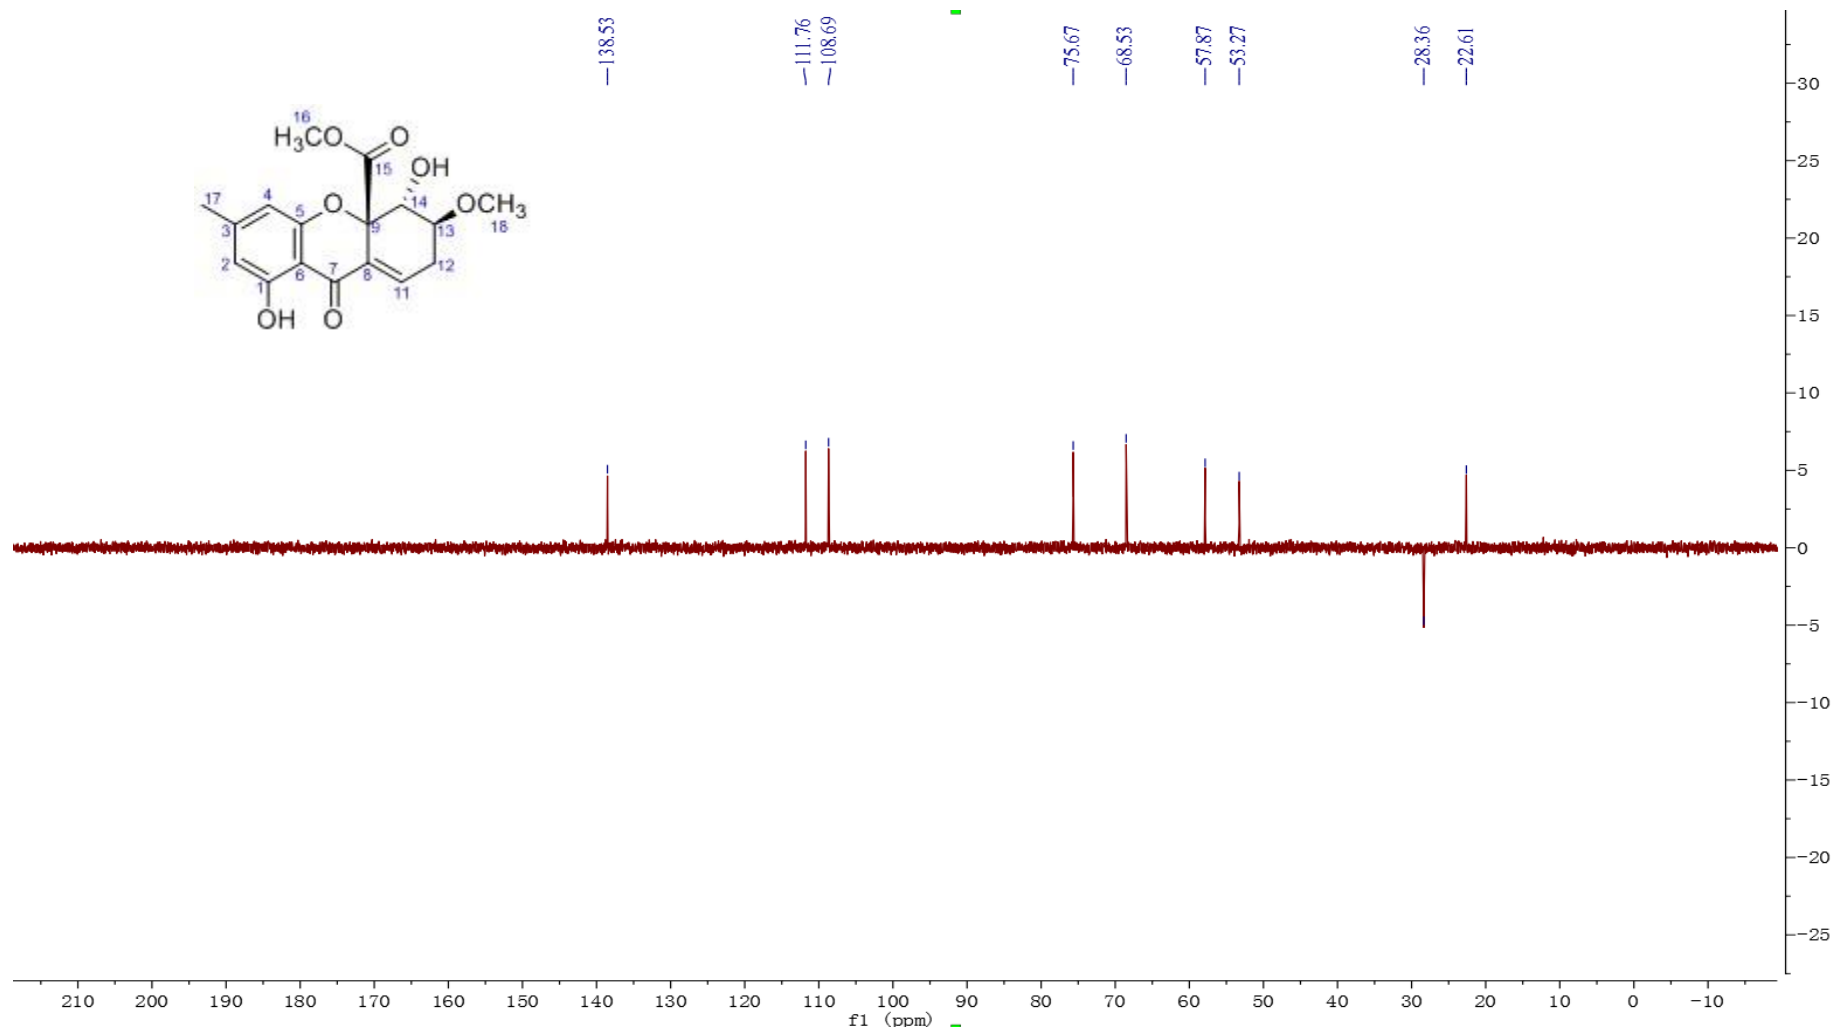

**Figure S9.** DEPT NMR spectrum of nidulalin D (**2**) in CDCl<sub>3</sub>.

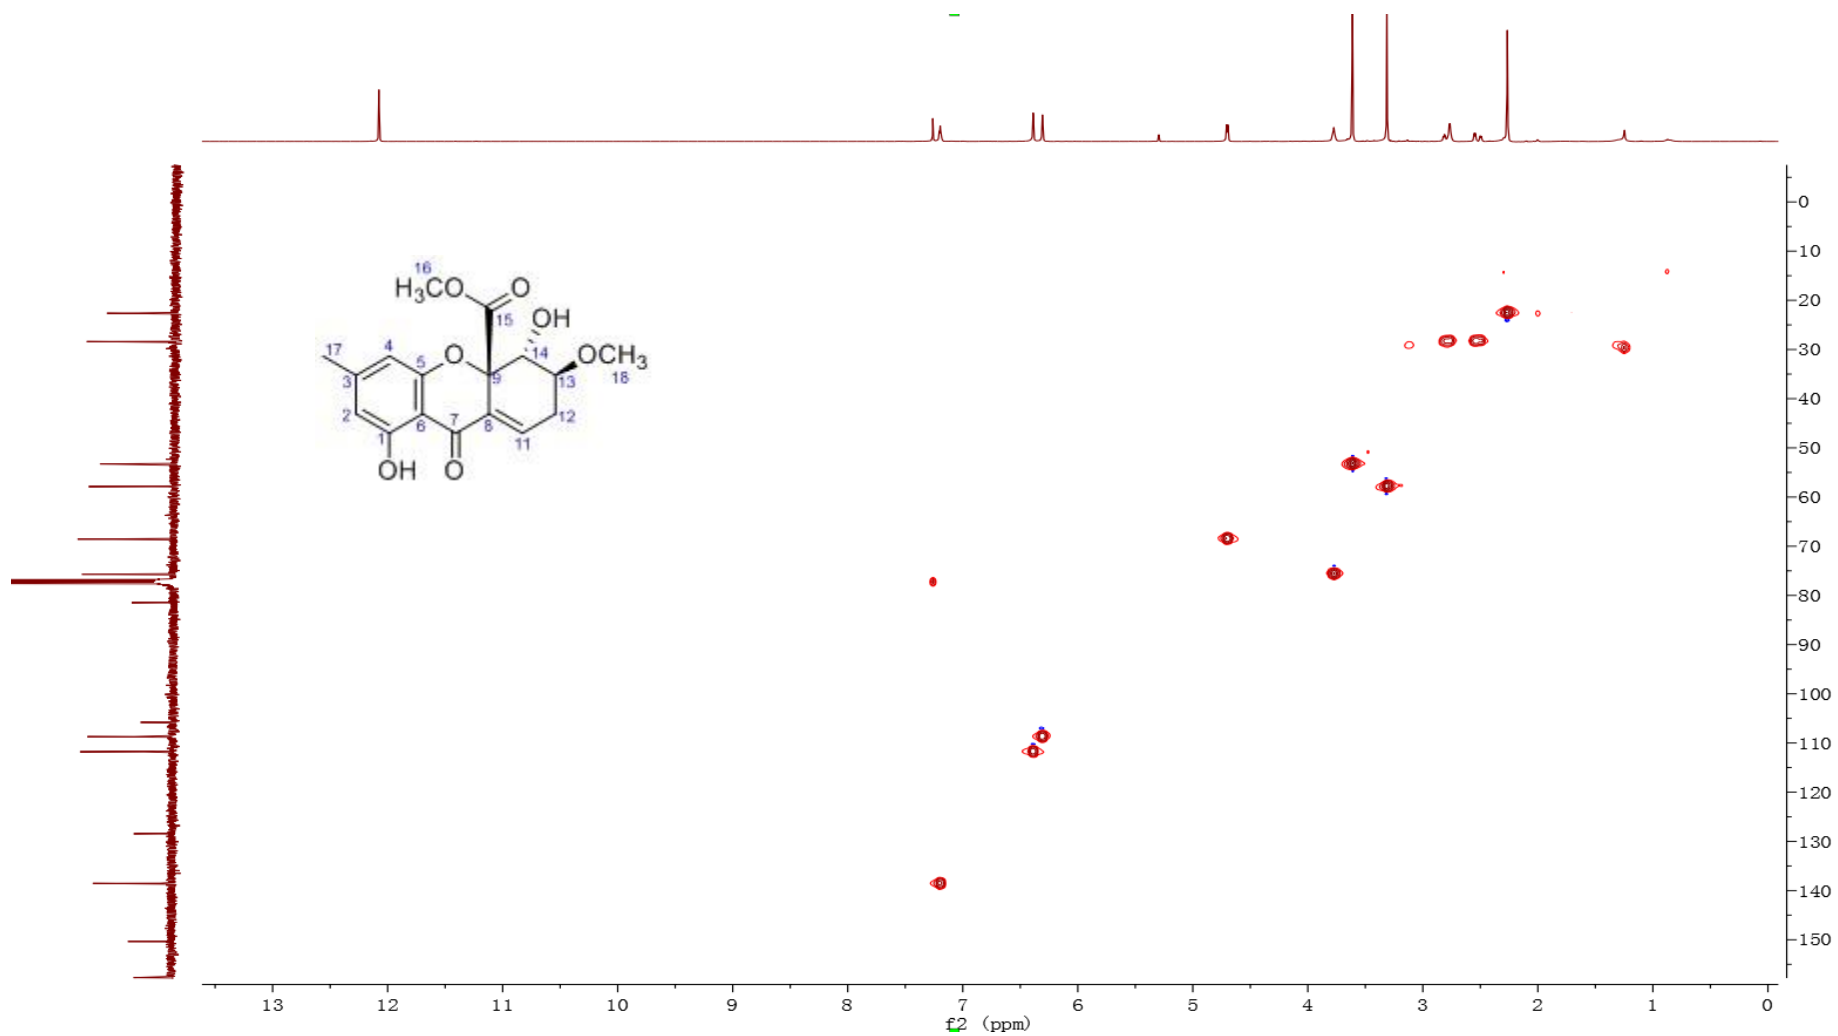

**Figure S10.** HSQC spectrum of nidulalin D (**2**) in CDCl<sub>3</sub>.

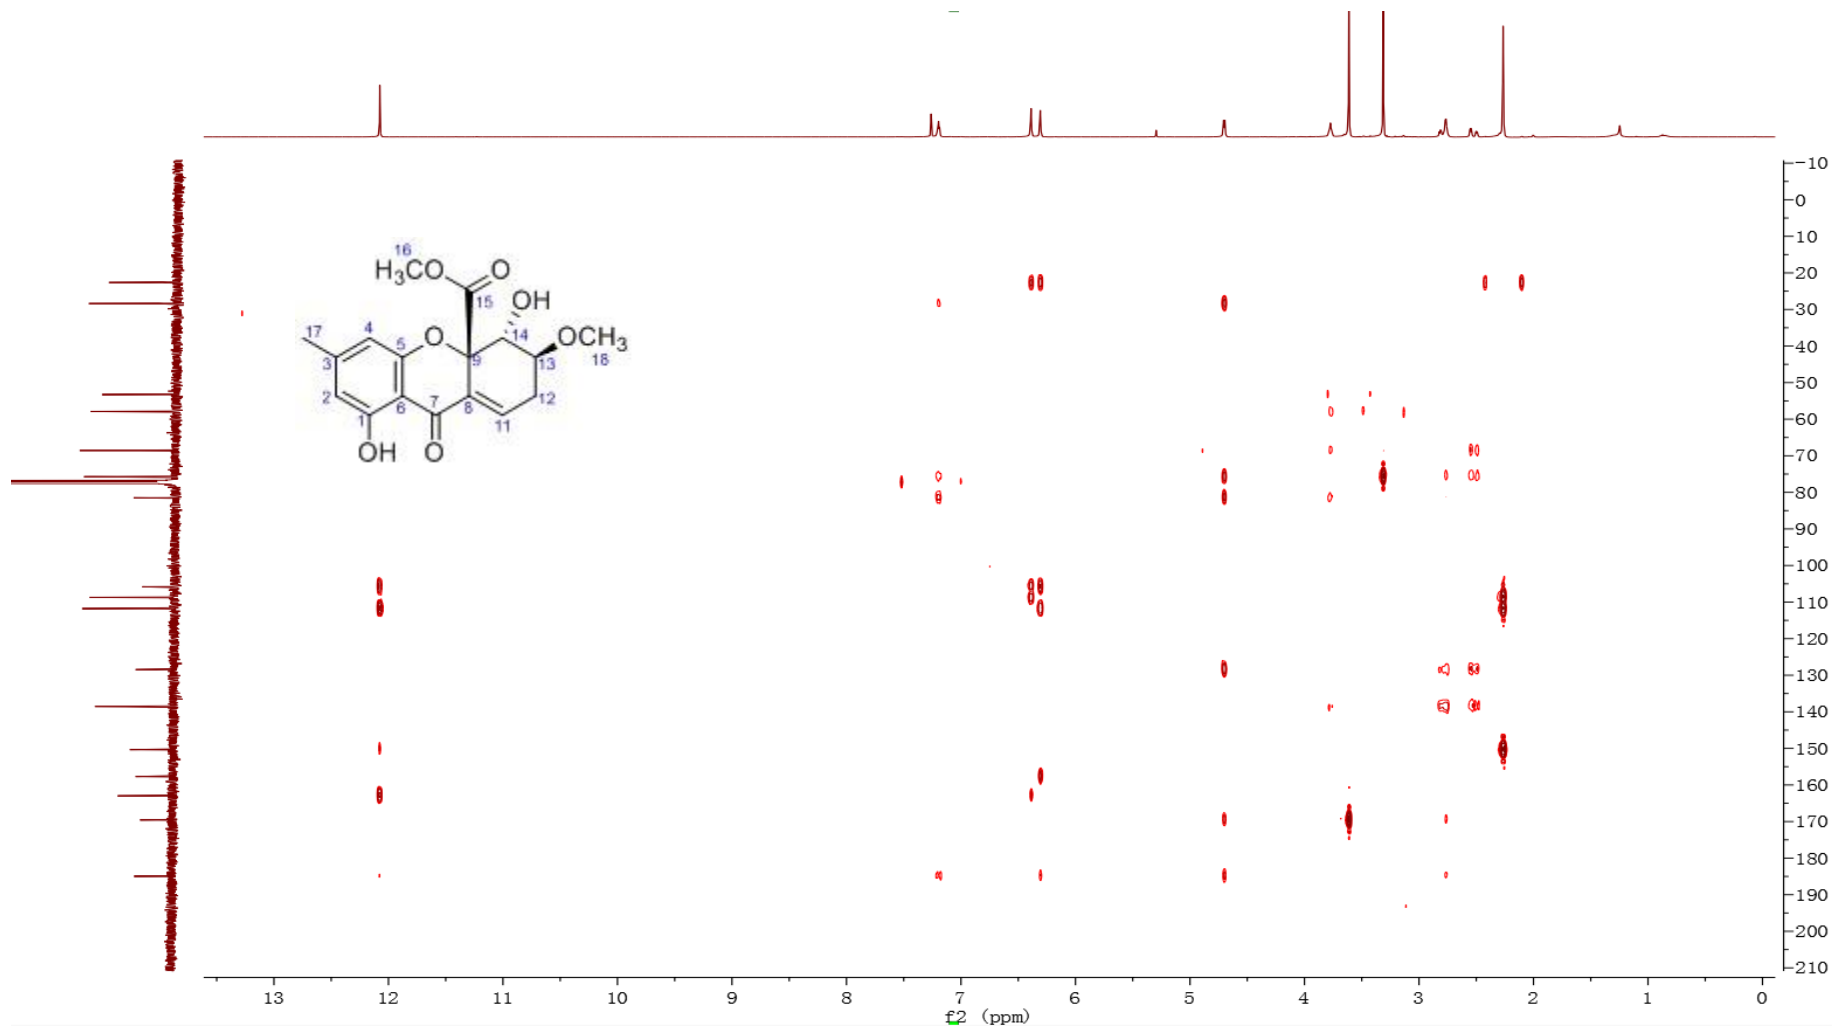

Figure S11. HMBC spectrum of nidulalin D (2) in CDCl<sub>3</sub>.

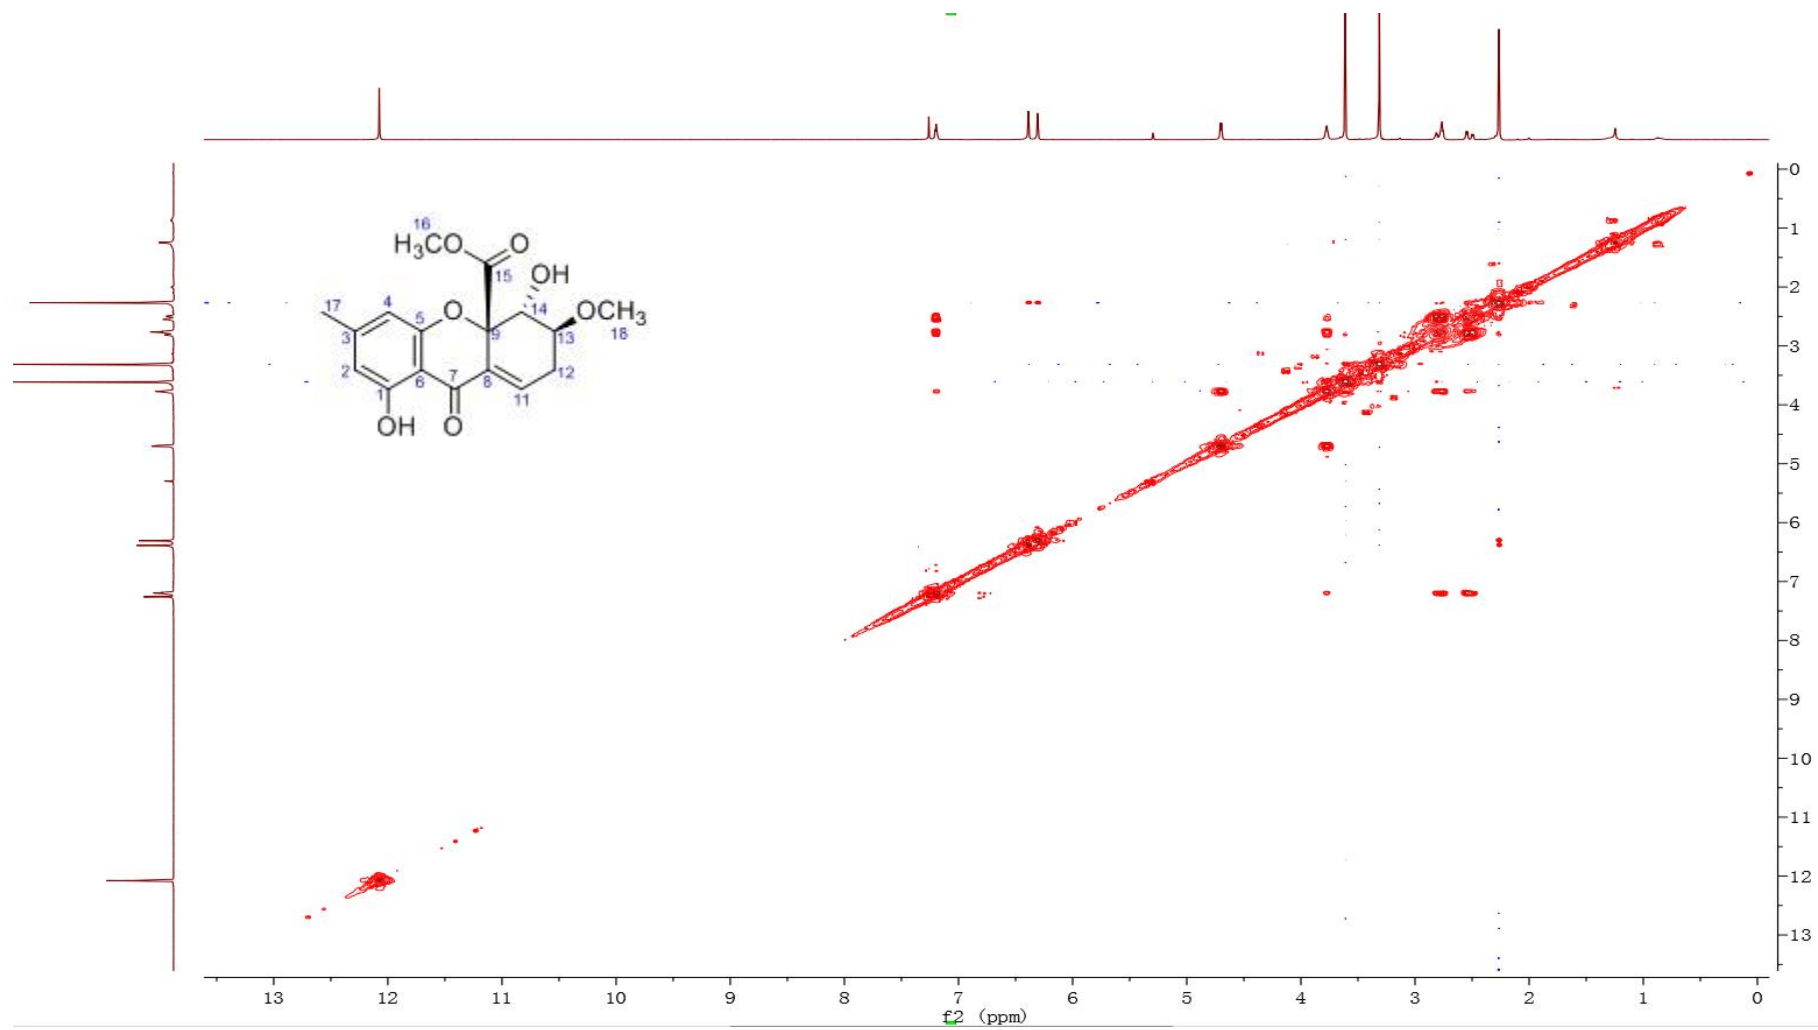

**Figure S12.**  $^1\text{H}$ - $^1\text{H}$  COSY spectrum of nidulalin D (**2**) in  $\text{CDCl}_3$



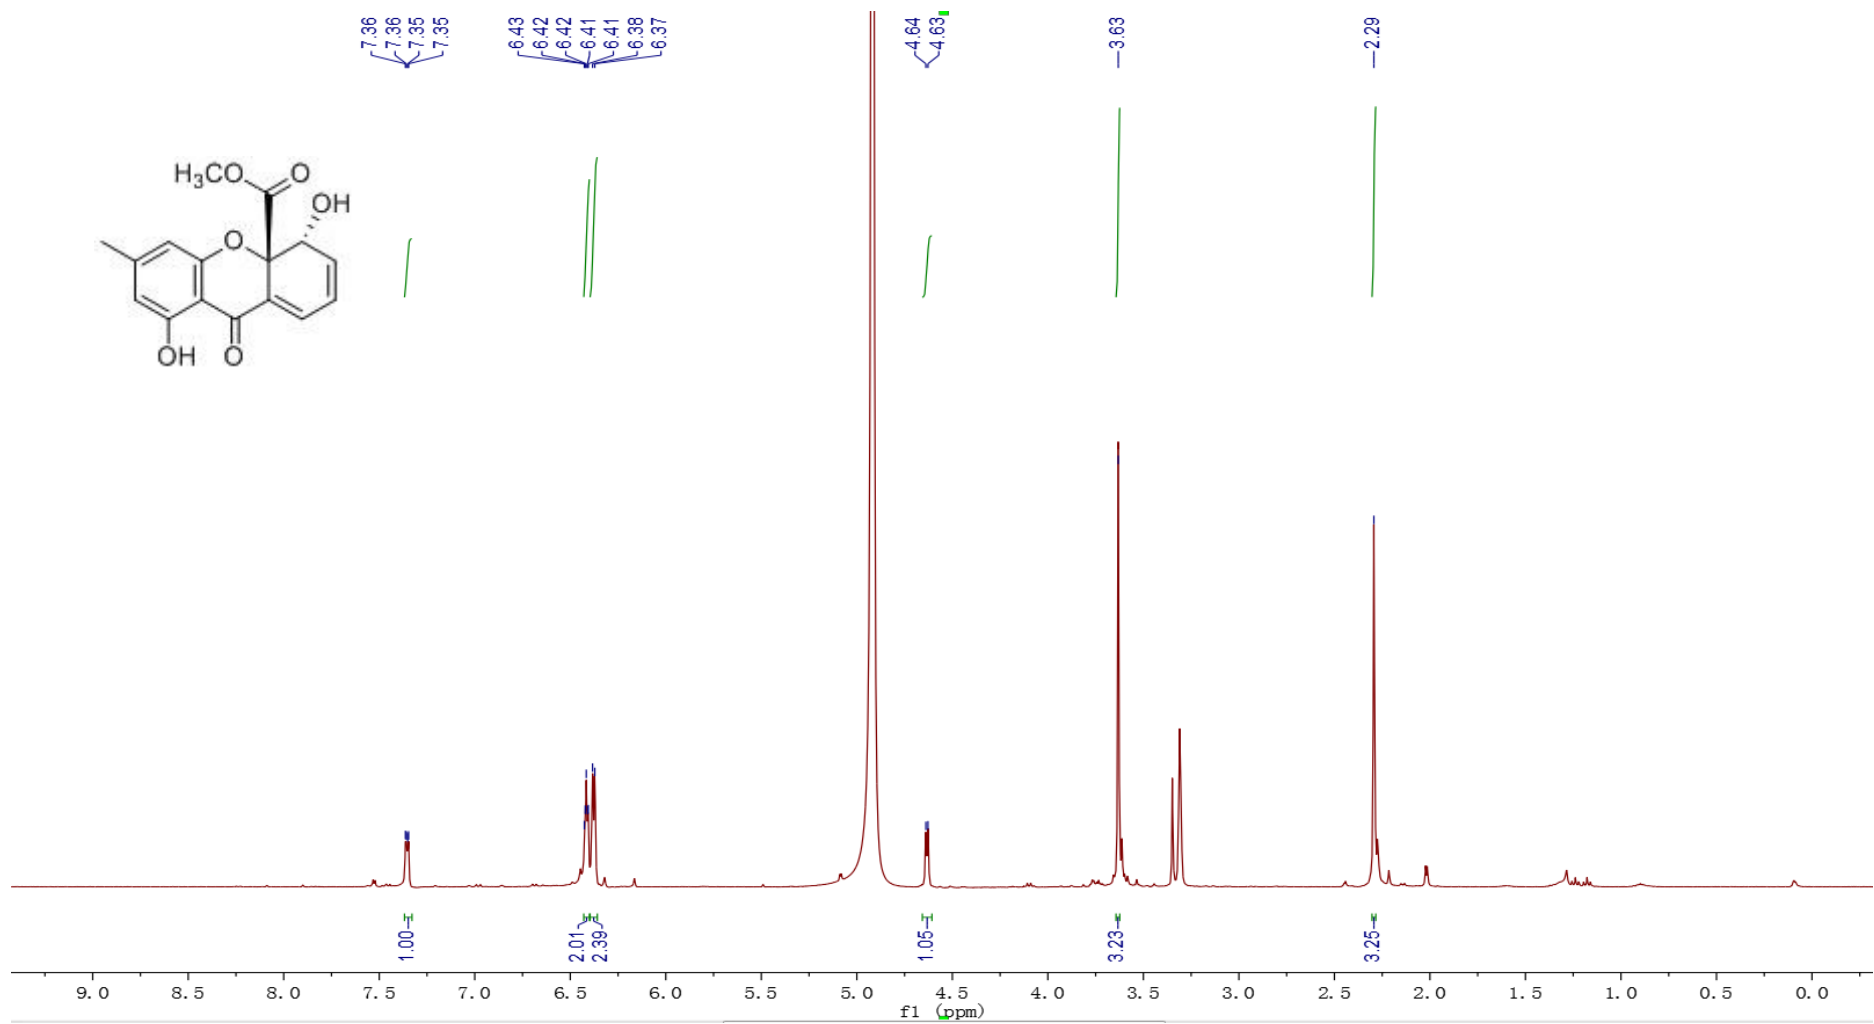

**Figure S13.** <sup>1</sup>H NMR spectrum of nidulalin A (**3**) in CD<sub>3</sub>OD.

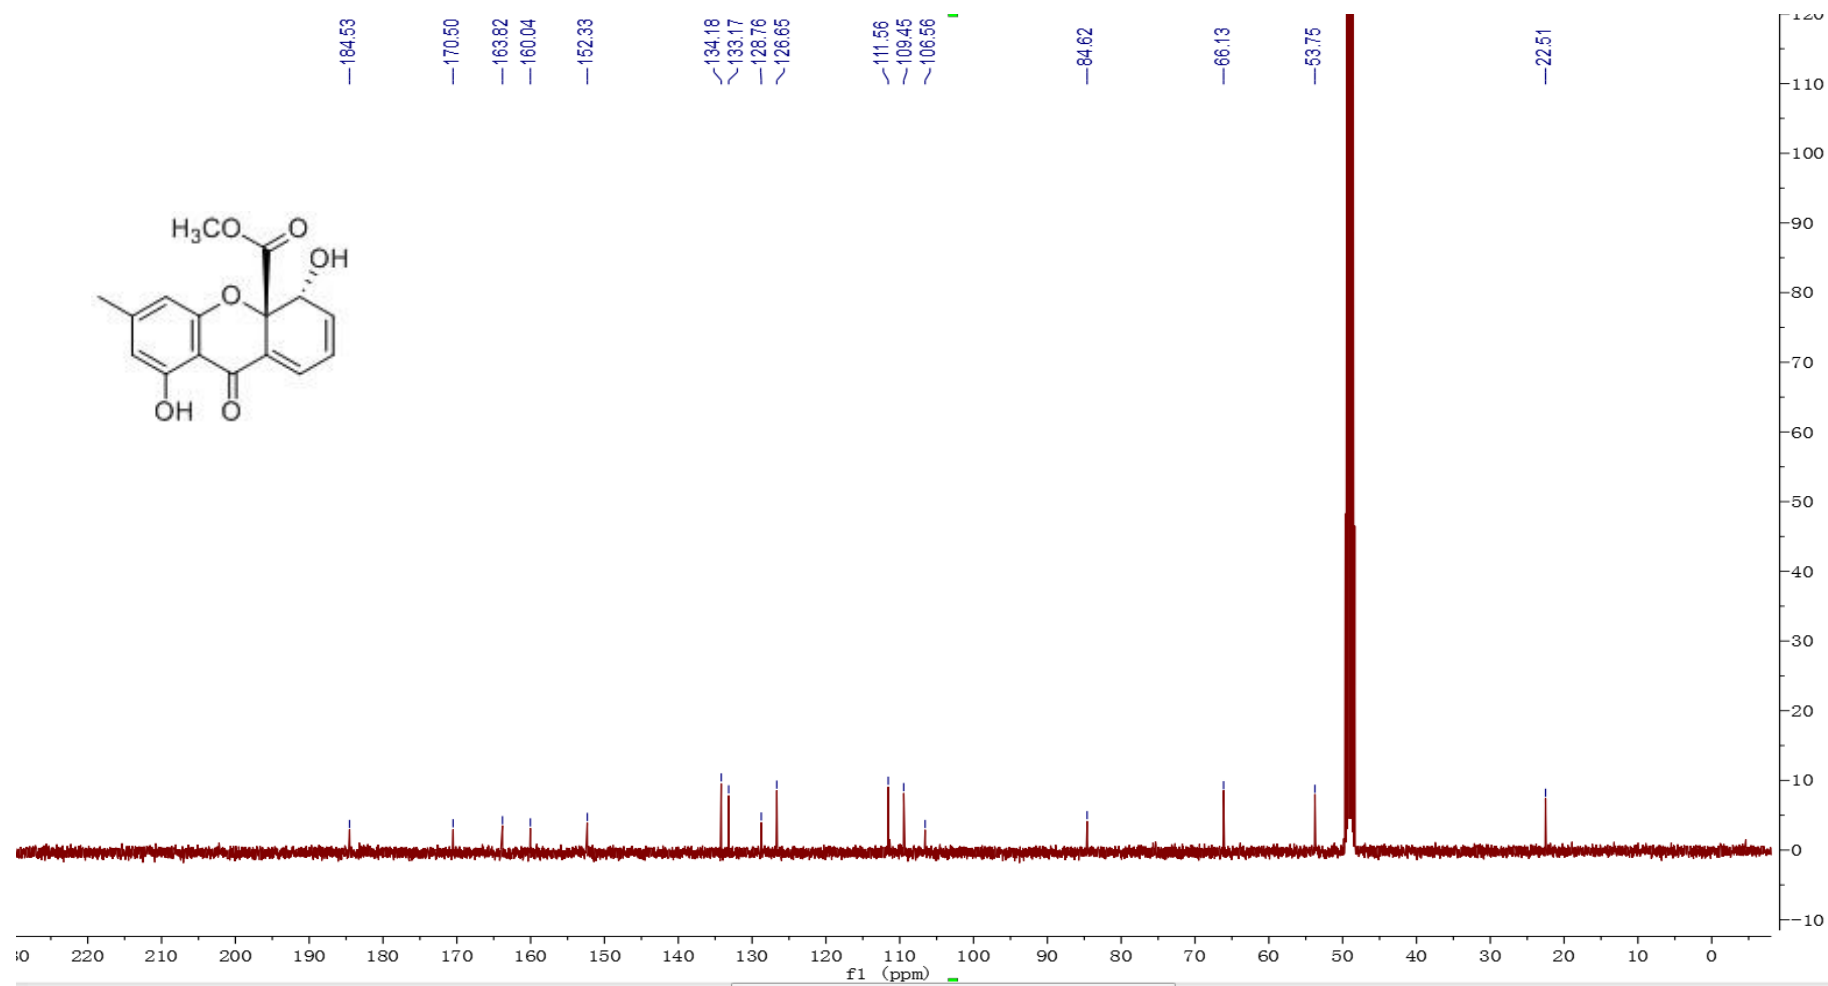

**Figure S14.** <sup>13</sup>C NMR spectrum of nidulalin A (**3**) in CD<sub>3</sub>OD.

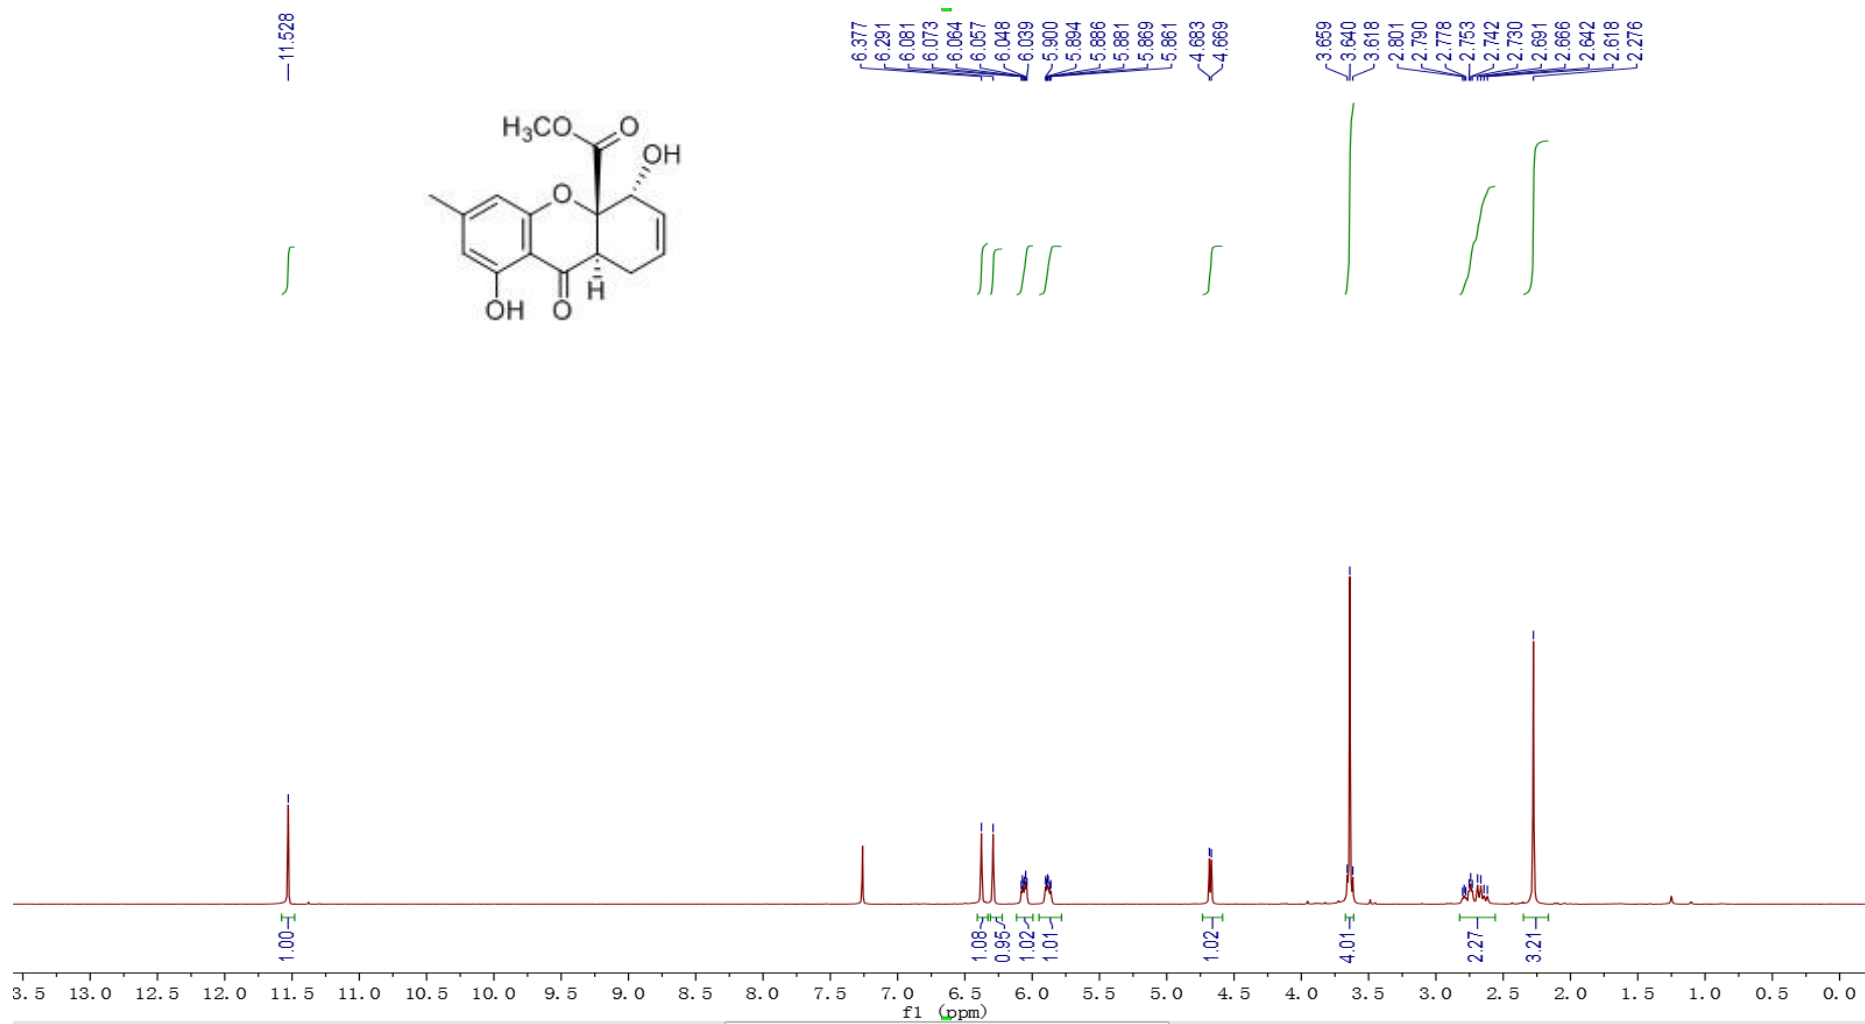

Figure S15. <sup>1</sup>H NMR spectrum of (4R,4aS,9aR)-1,9a-dihydronidulalin A (4) in CDCl<sub>3</sub>.

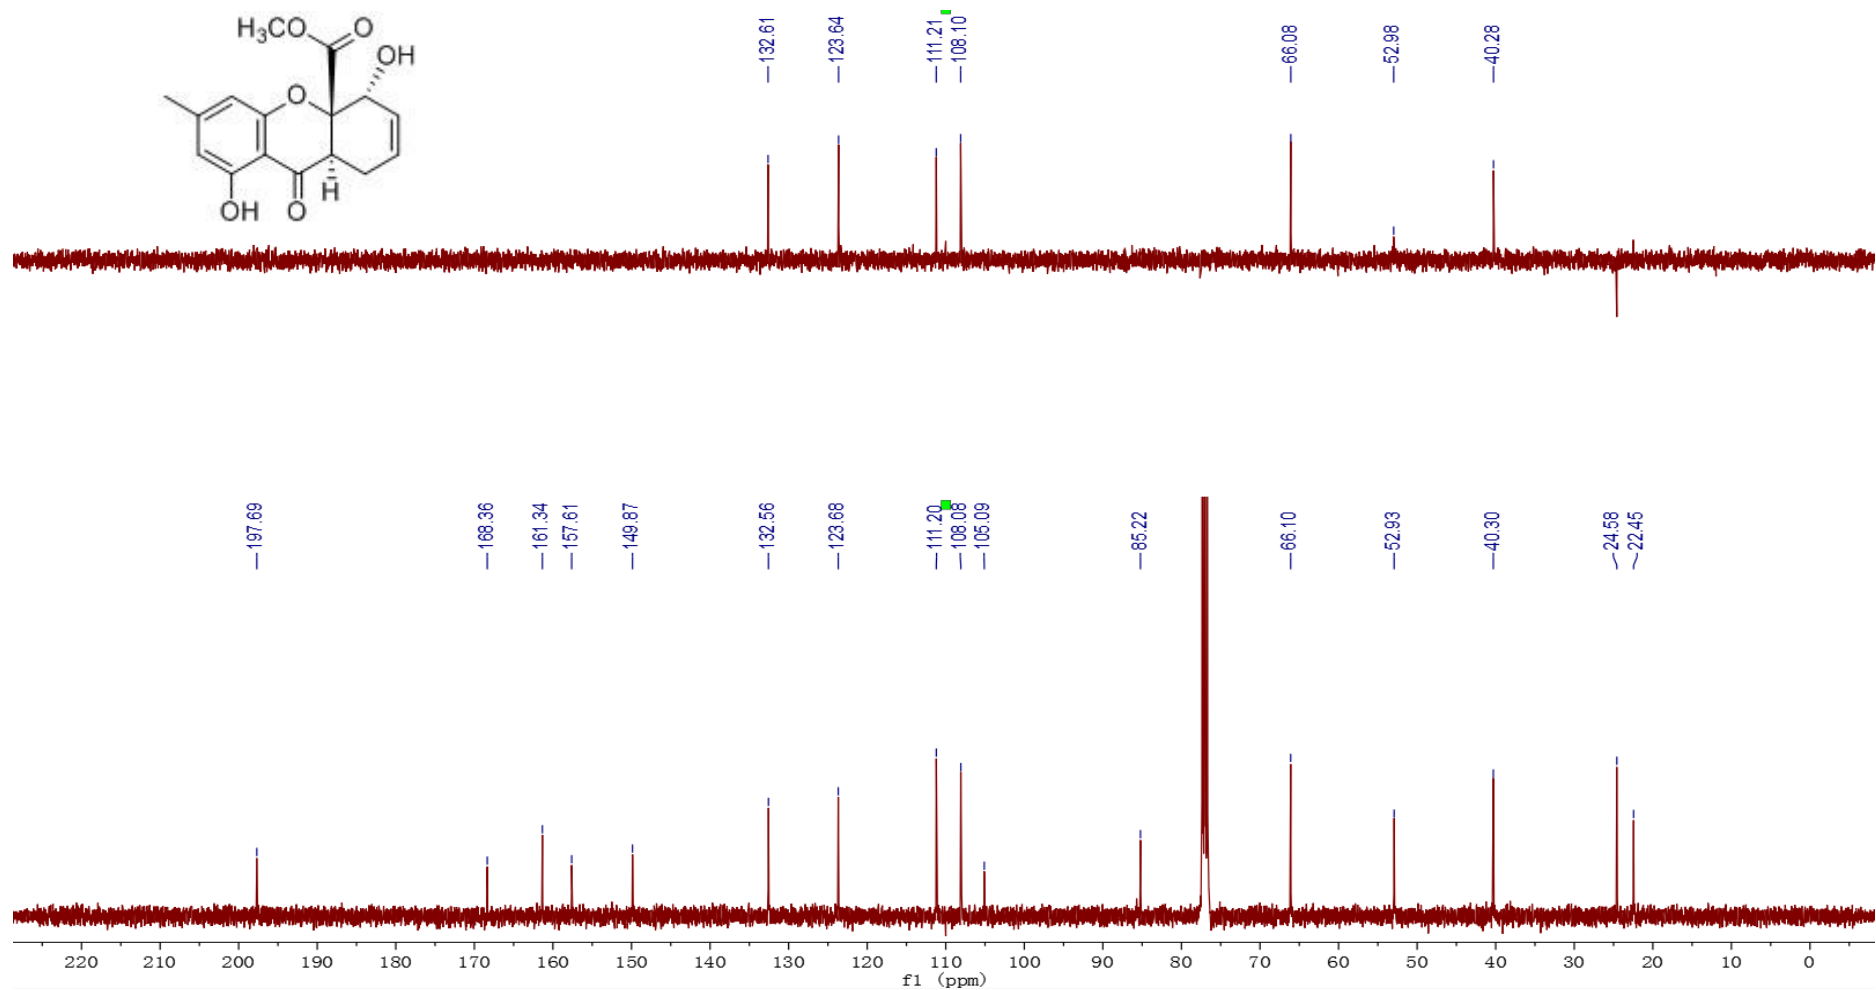

**Figure S16.** <sup>13</sup>C NMR and DEPT spectra of (4*R*,4*aS*,9*aR*)-1,9*a*-dihydronidulalin A (**4**) in CDCl<sub>3</sub>

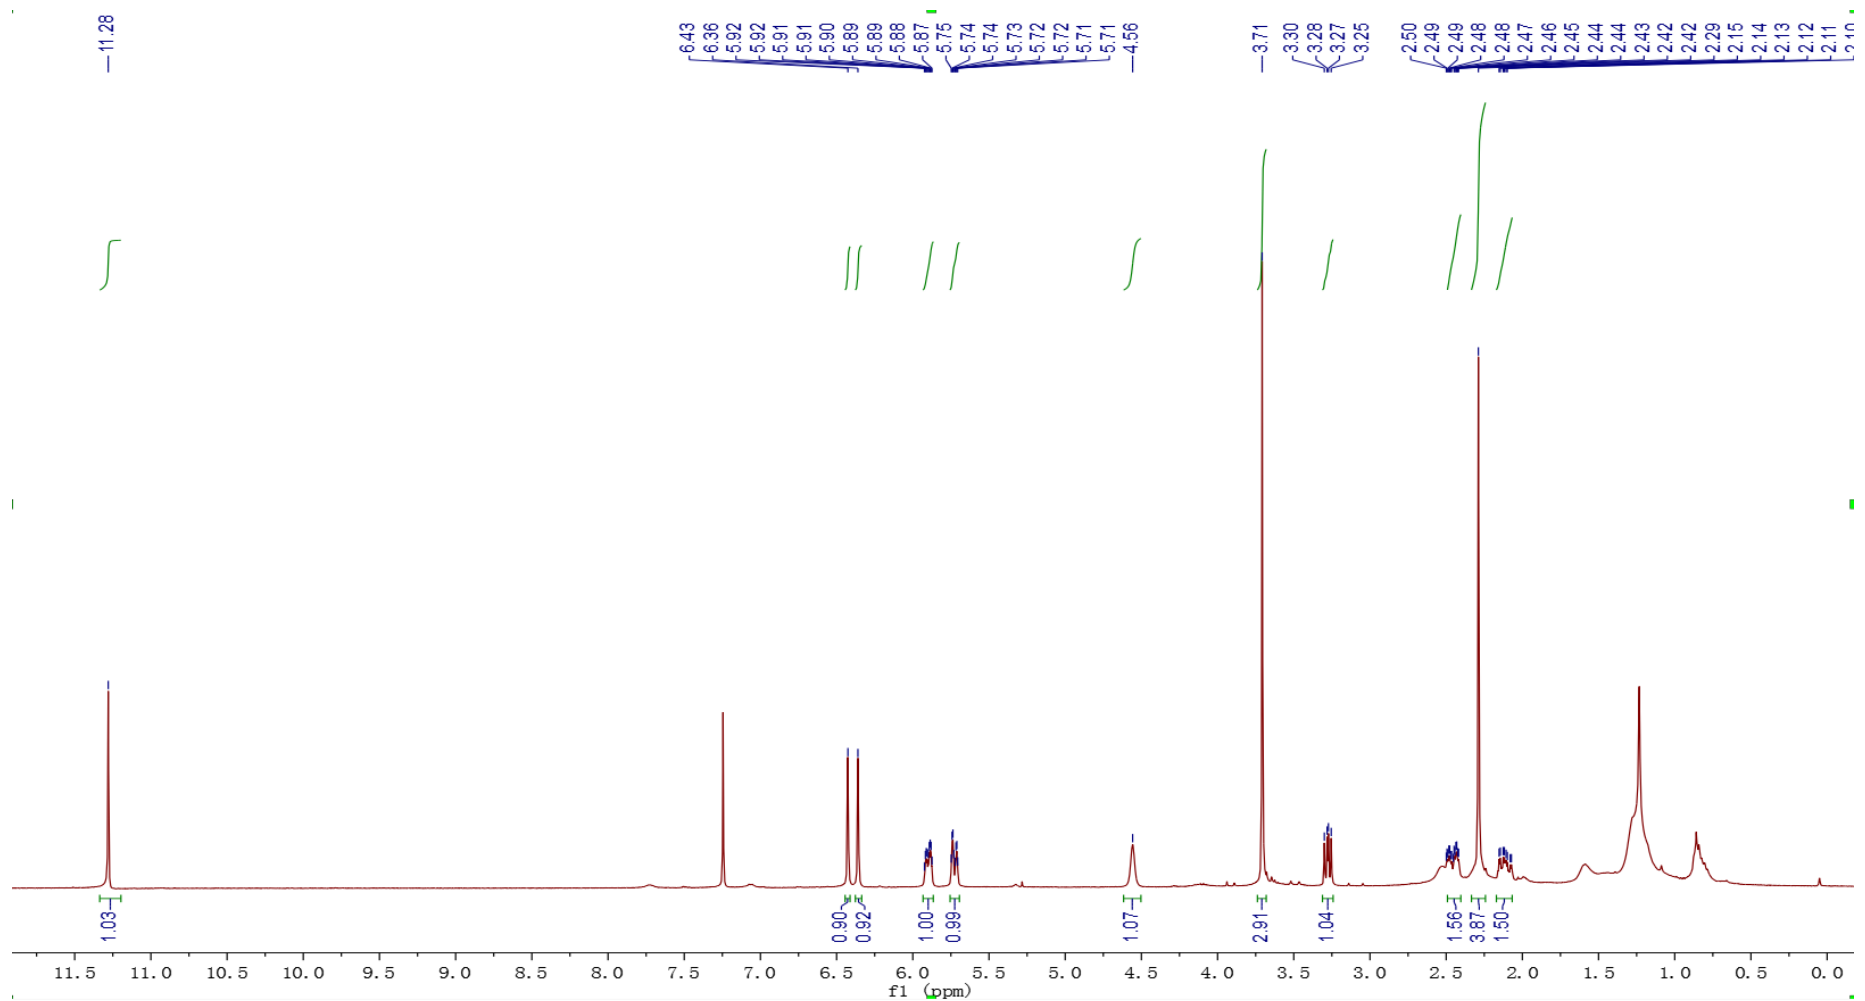

**Figure S17.** <sup>1</sup>H NMR spectrum of (4S,4aR,9aR)-4a-carbomethoxy-1,4,4a,9a-tetrahydro-4,8 dihydroxy-6-methylxanthone (**5**) in CDCl<sub>3</sub>.

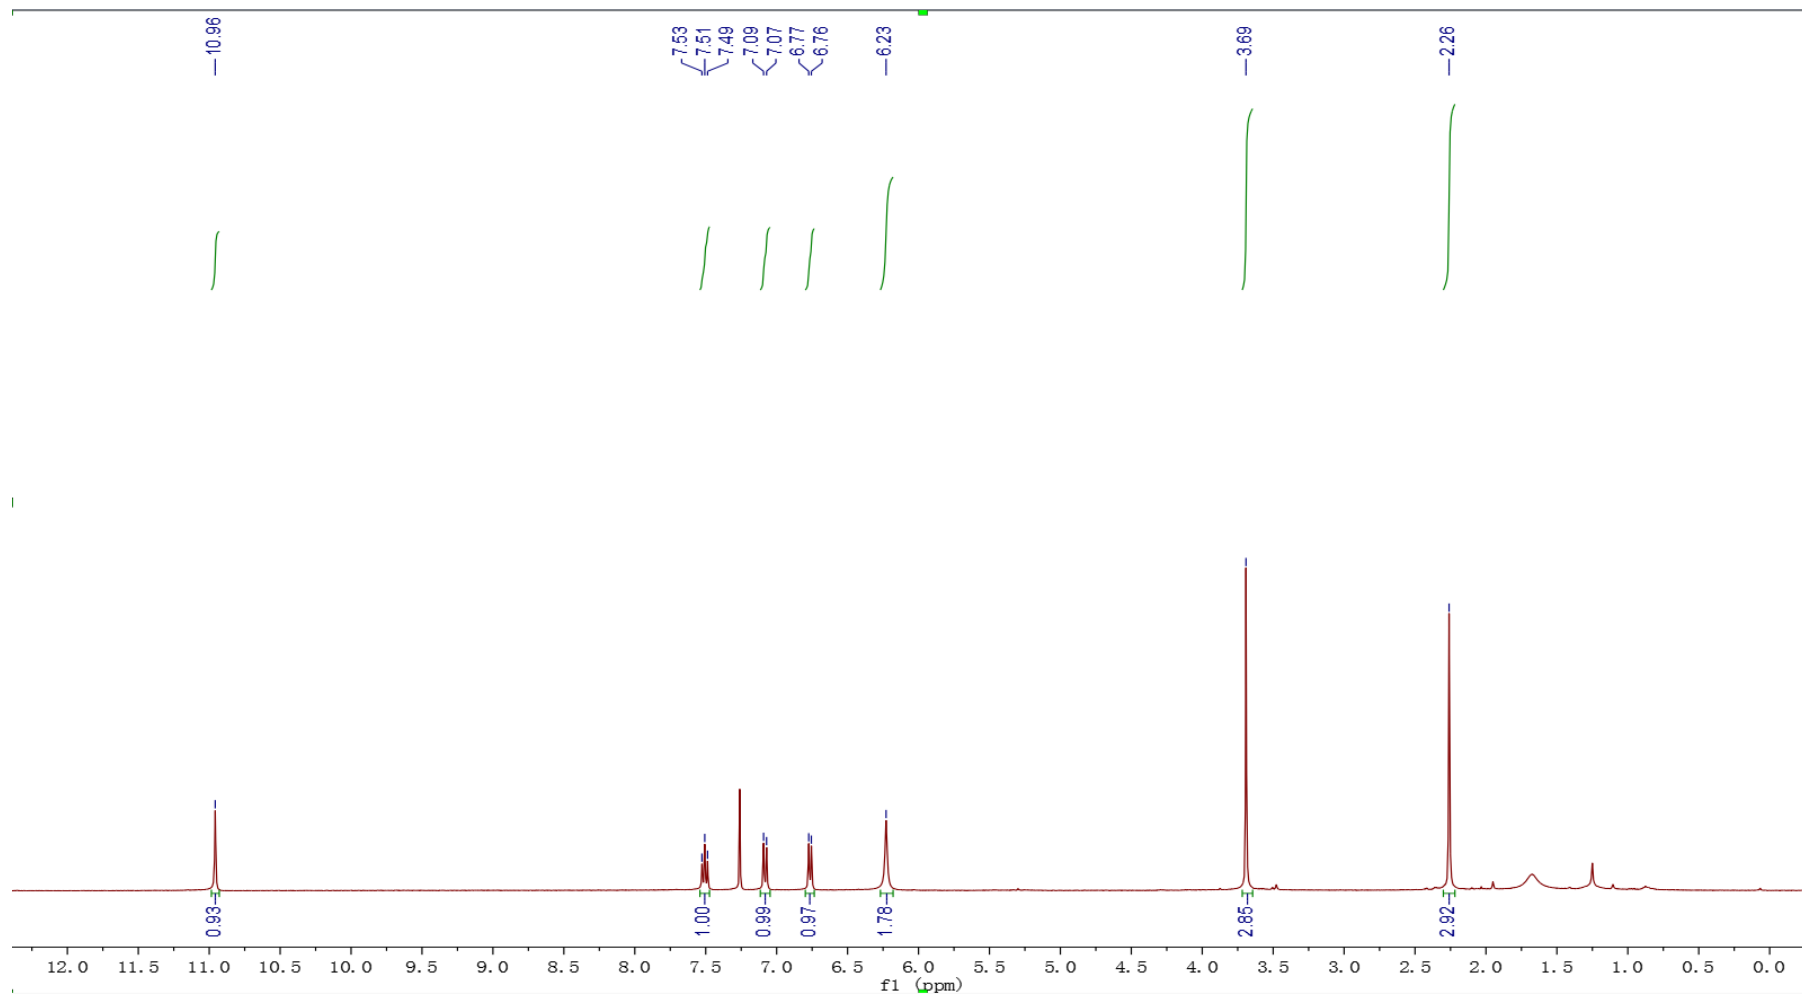

**Figure S18.**  $^1\text{H}$  NMR spectrum of nidulalin B (**6**) in  $\text{CDCl}_3$ .

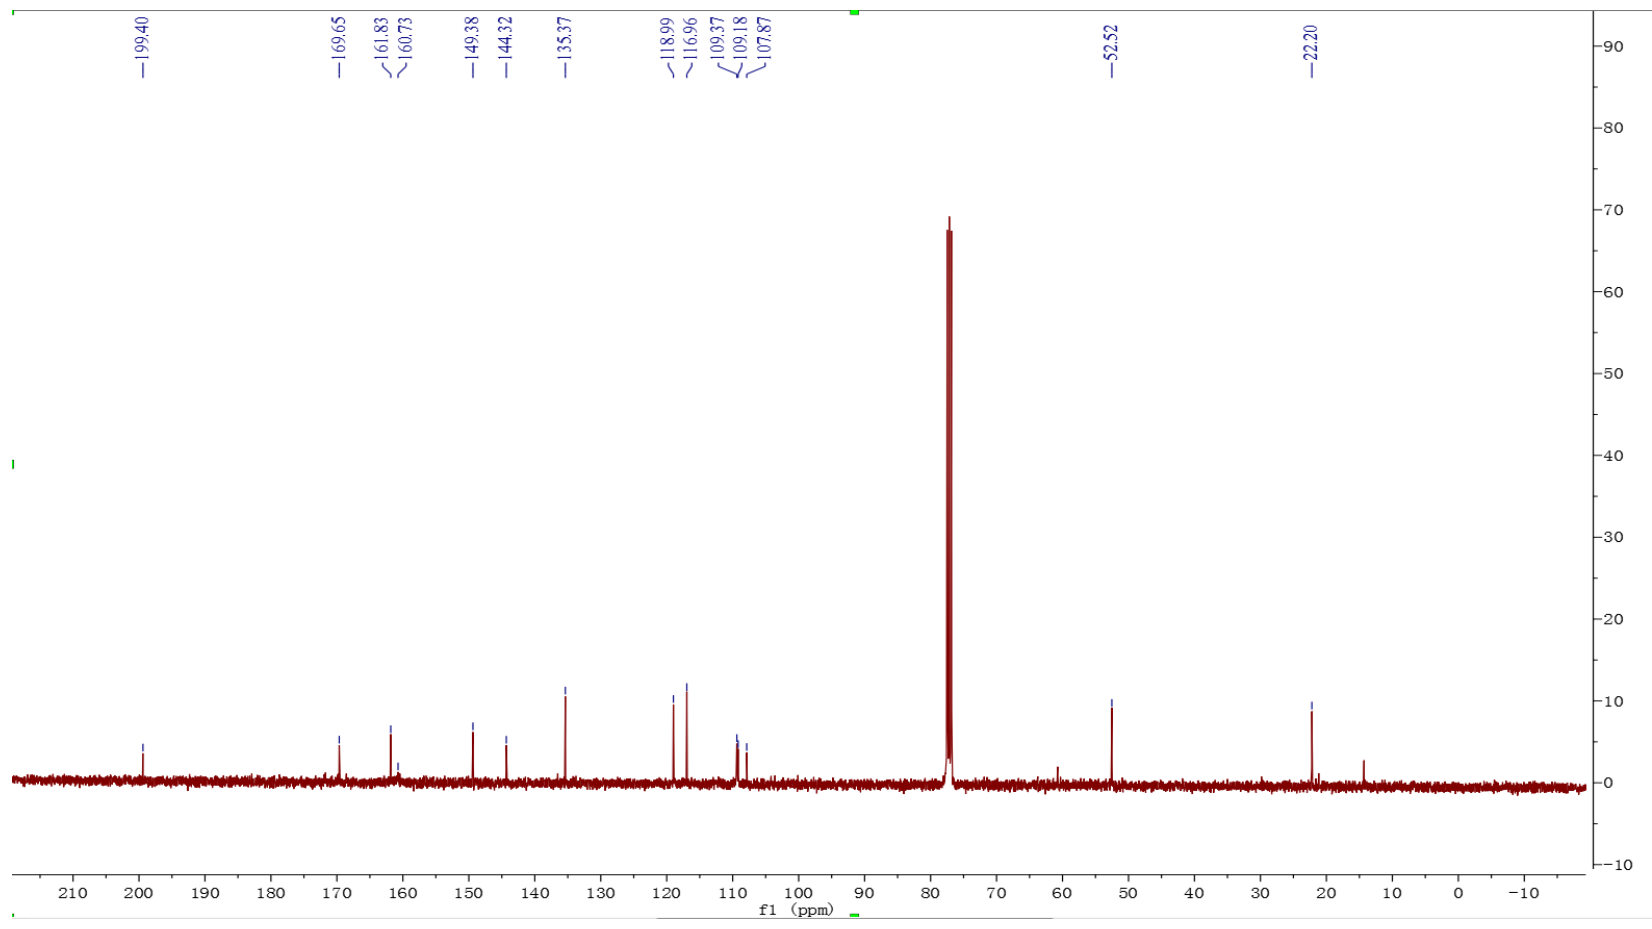

**Figure S19.** <sup>13</sup>C NMR spectrum of nidulalin B (**6**) in CDCl<sub>3</sub>.

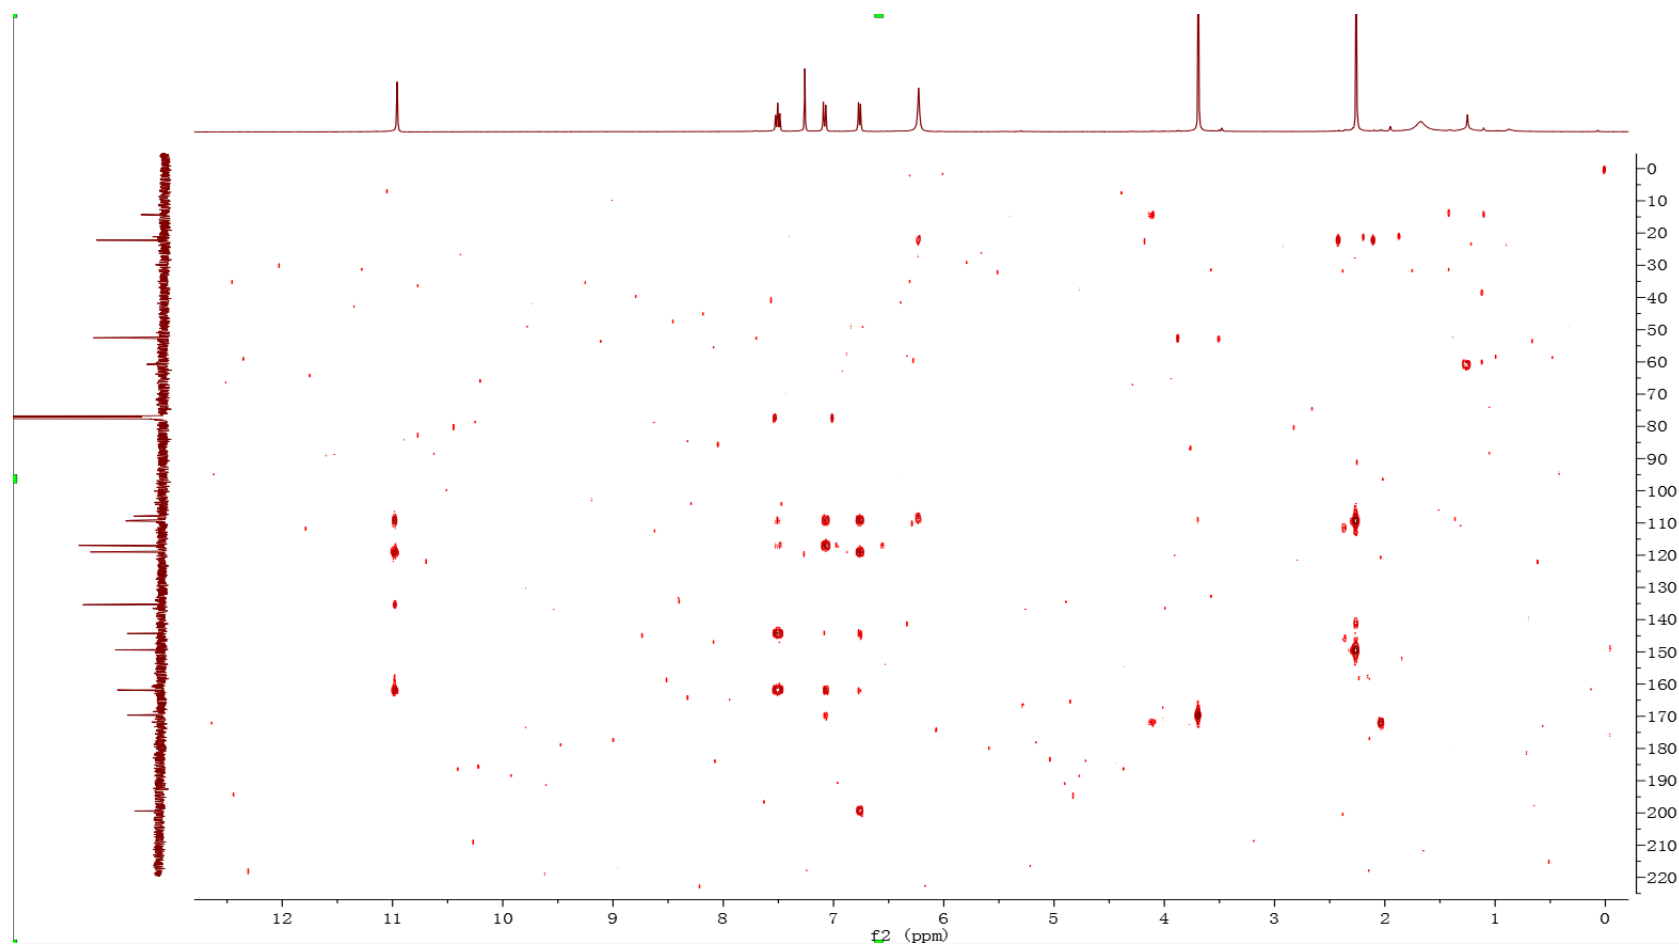

**Figure S20.** HMBC spectrum of nidulalin B (**6**) in CDCl<sub>3</sub>.



J-13-9#967 RT: 9.52 AV: 1 NL: 1.37E7  
T: FTMS + p ESI Full ms [150.0000-2000.0000]

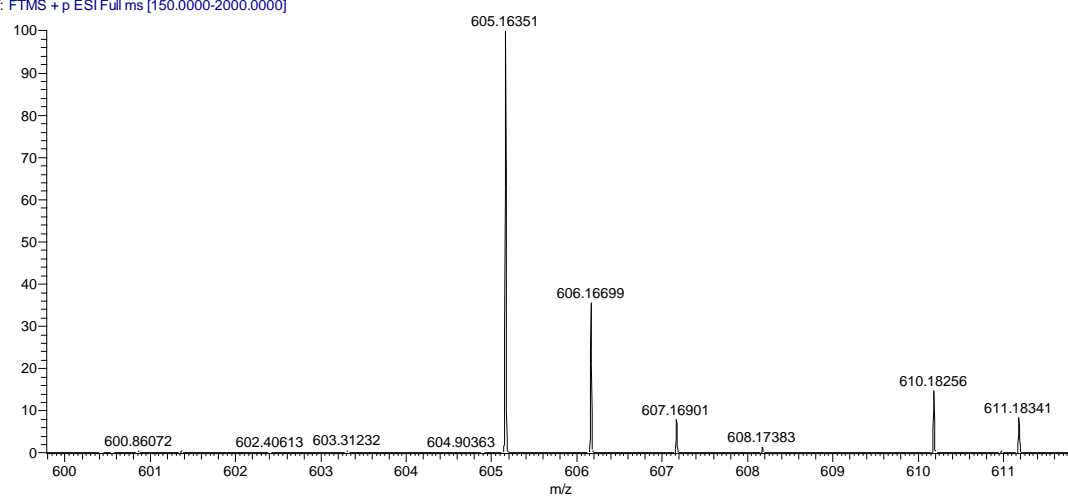

**Figure S21.** HRESIMS spectrum of nidulaxanthone A (**1**).

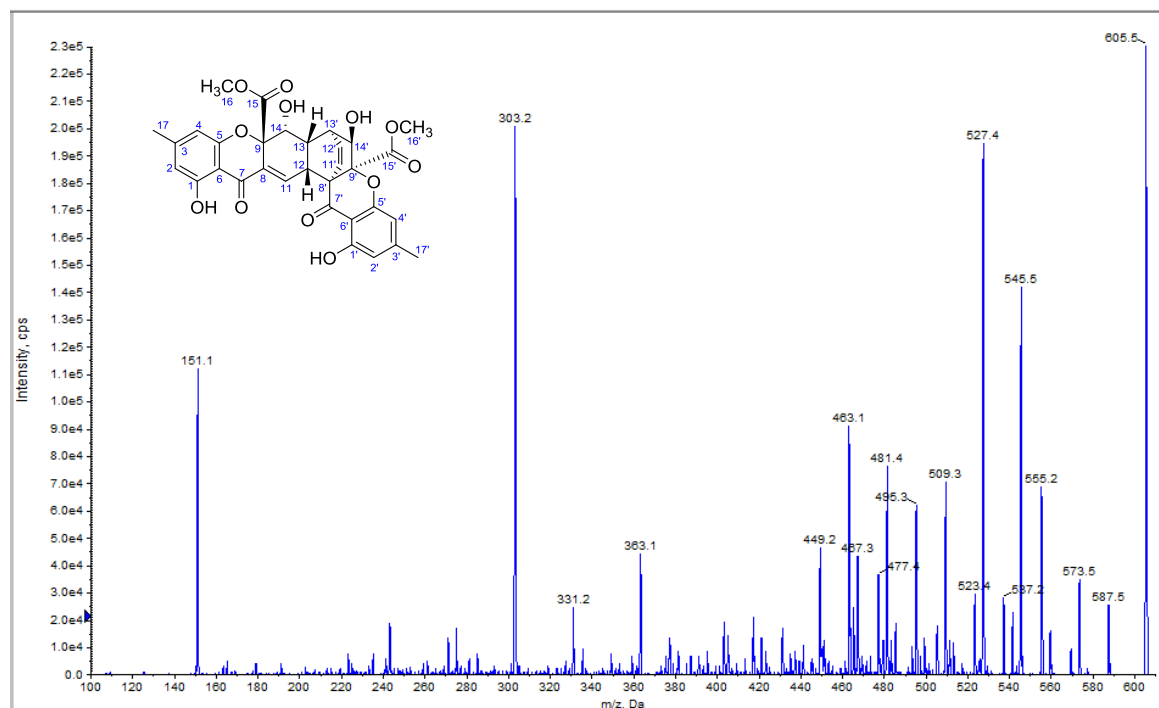

**Figure S22.** MS-MS spectrum of nidulaxanthone A (**1**). (de-hydroxy, de-methoxylation and de-acetylation fragments at m/z: 545, 573 and 587)

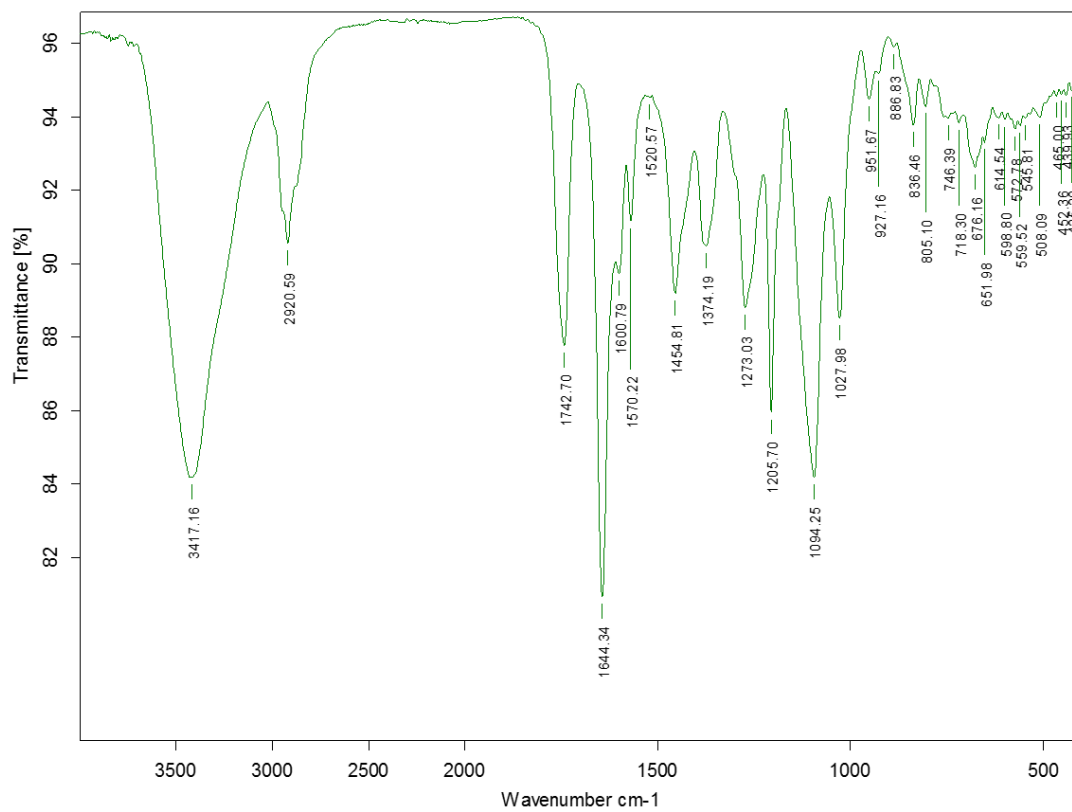

**Figure S23.** IR spectrum of nidulaxanthone A (**1**)

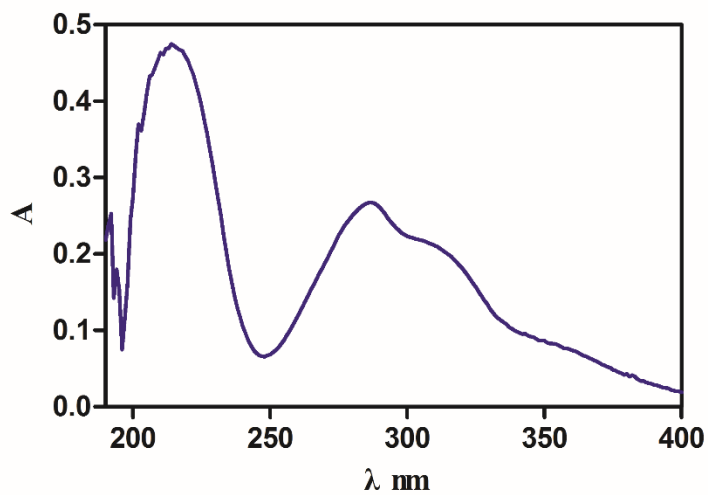

**Figure S24.** UV spectrum of nidulaxanthone A (**1**).

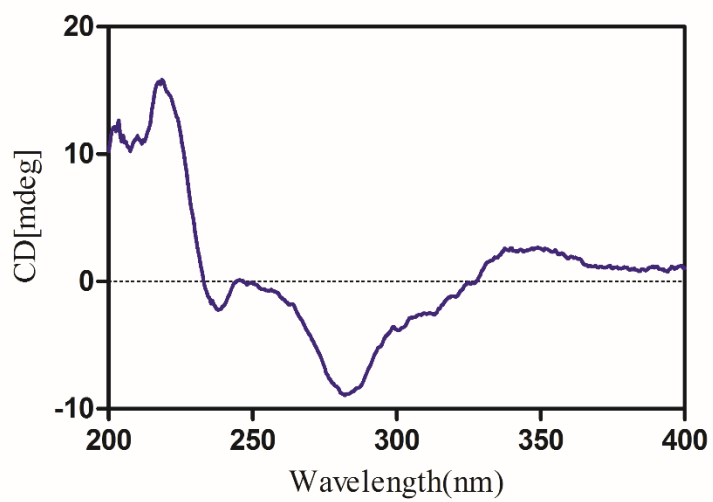

**Figure S25.** CD spectra of nidulaxanthone A (1)

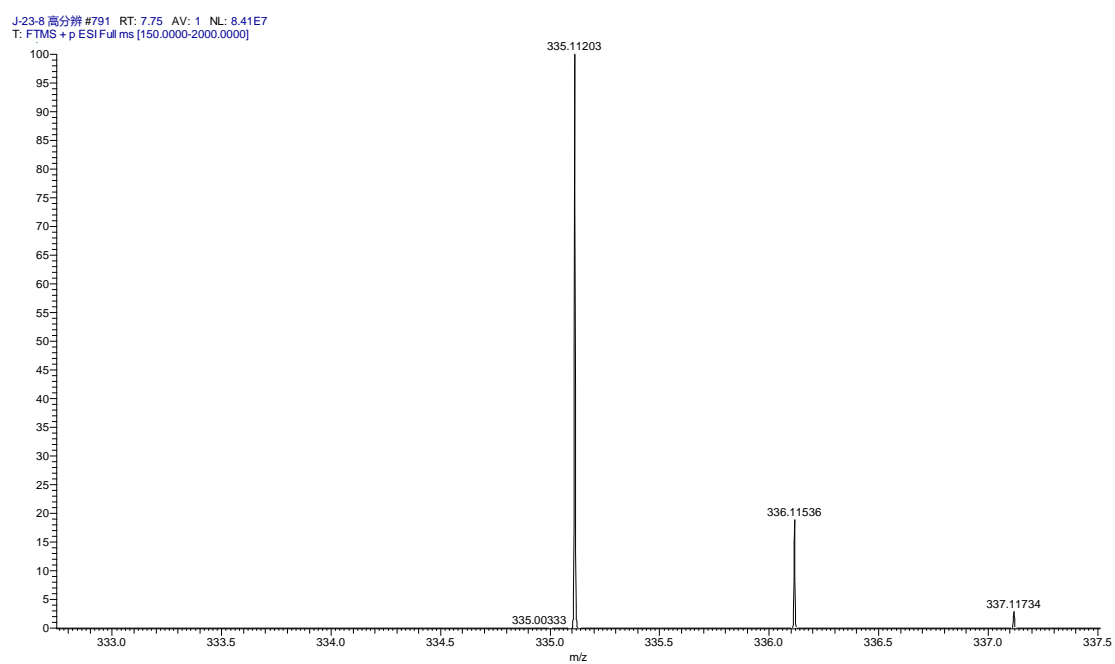

**Figure S26.** HRESIMS spectrum of nidulalin D (2).

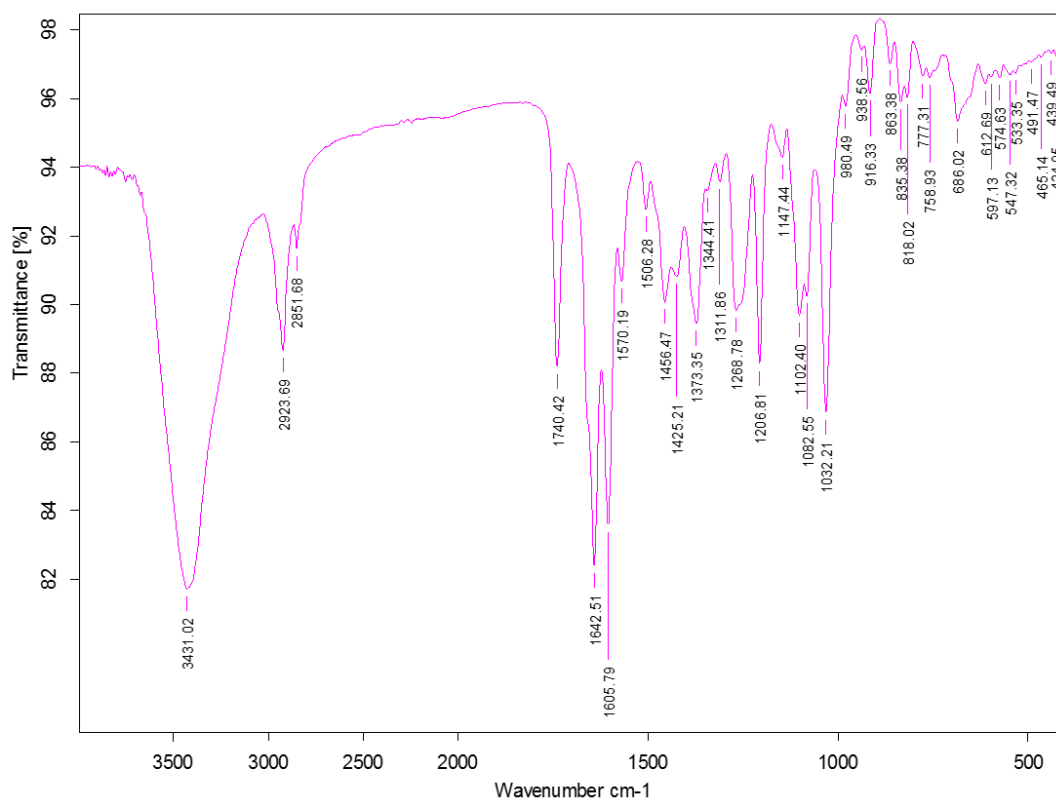

**Figure S27.** IR spectrum of nidulalin D (2).

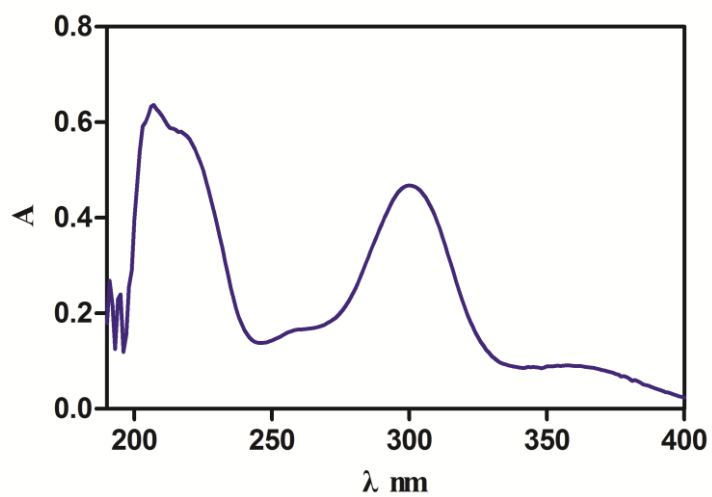

**Figure S28.** UV spectrum of nidulalin D (2).

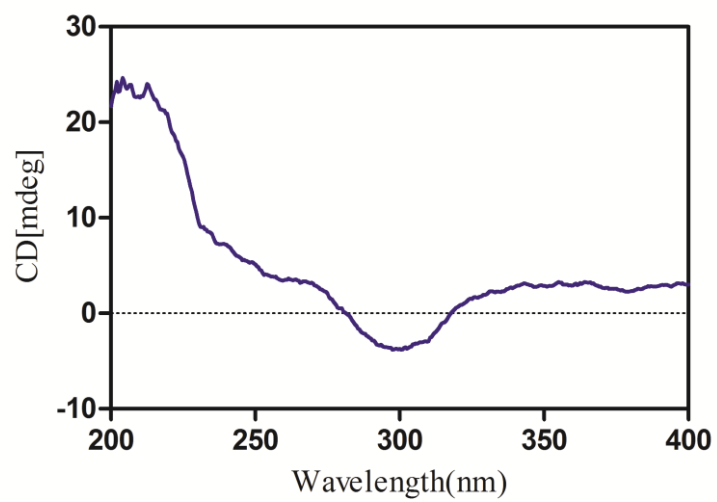

**Figure S29.** CD spectra of nidulalin D (2).

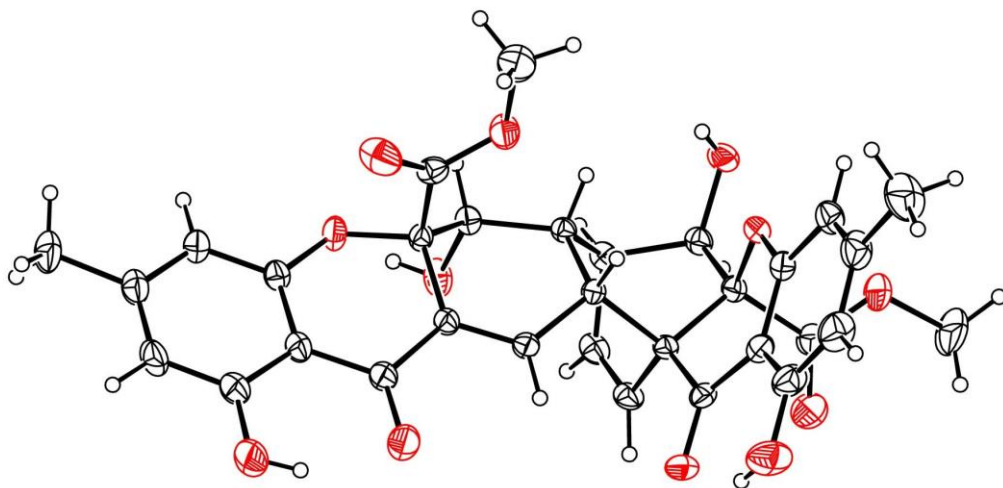

**Figure S22.** X-ray crystallographic structure of nidulaxanthone A (1).

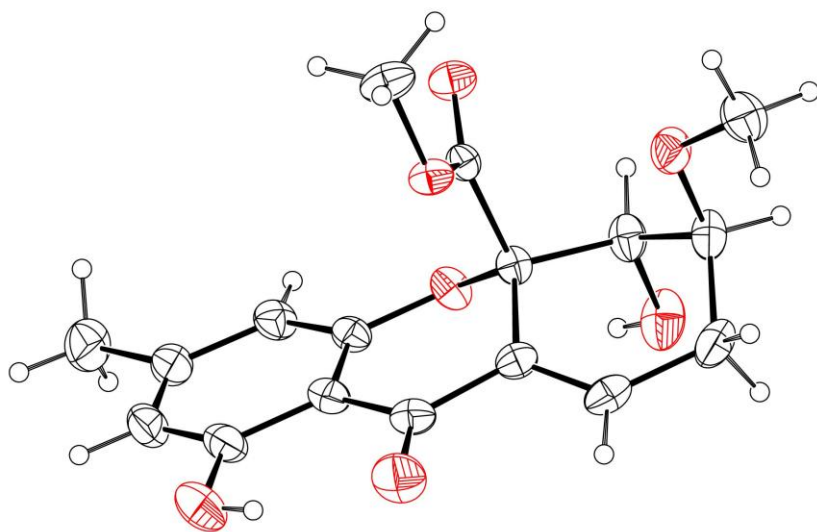

**Figure S23.** X-ray crystallographic structure of nidulalin D (2)
